# Supplementary material
Source: MDPI journal article supplement (https://www.mdpi.com/2311-7524/9/2/175)
Supplement: s1 [file s1 › Table S1.xlsx]

## Sheet: Alternative_analysis.summary
Table S1 Classification of isofomrs by cuffcompare software
class_code	cuffcompare code definition	isoform counts
=	Complete match of intron chain	14184
c	Transcripts contained in reference transcript annotation	1392
e	Single exon that partially covers an intron from reference	1912
i	Fully contained within a reference intron	25
j	Multi-exon with at least one junction match	15381
o	Generic exonic overlap with a reference transcript	482
p	Possible polymerase run-on fragment (within 2Kbases of a reference transcript)	66
s	Intron match on the opposite strand	1
x	Exonic overlap with reference on the opposite strand	407
u	Potentially novel gene	546
