# Supplementary material
Source: MDPI journal article supplement (https://www.mdpi.com/2311-7524/9/2/175)
Supplement: s1 [file s1 › Table S2.xlsx]

## Sheet: F01.fusion_transcript
Table S2 A list of peach fusion transcripts identified by Iso-Seq
Chromosome	Start	End	Direction	Fusion transcript	Fusion transcript framents
Pp01	11150175	11151140	-	PBfusion.1;	PBfusion.1.1;
Pp02	2487177	2491237	-	PBfusion.1;	PBfusion.1.2;
Pp04	758213	758884	+	PBfusion.10;	PBfusion.10.1;
scaffold_112	131	2960	-	PBfusion.10;	PBfusion.10.2;
Pp06	29594360	29595946	+	PBfusion.100;	PBfusion.100.1;
Pp07	5473668	5473797	-	PBfusion.100;	PBfusion.100.2;
Pp01	35697338	35700683	-	PBfusion.101;	PBfusion.101.1;
Pp04	484572	484637	-	PBfusion.101;	PBfusion.101.2;
Pp01	43306331	43307701	+	PBfusion.102;	PBfusion.102.1;
Pp06	10493060	10493412	+	PBfusion.102;	PBfusion.102.2;
Pp06	2151155	2158166	-	PBfusion.103;	PBfusion.103.1;
scaffold_271	661	874	+	PBfusion.103;	PBfusion.103.2;
Pp01	29229187	29231696	+	PBfusion.104;	PBfusion.104.1;
Pp05	128717	128805	+	PBfusion.104;	PBfusion.104.2;
Pp01	17524080	17524411	+	PBfusion.105;	PBfusion.105.1;
Pp02	3527210	3530926	-	PBfusion.105;	PBfusion.105.2;
Pp07	8329	8560	+	PBfusion.106;	PBfusion.106.1;
Pp07	19563091	19565681	+	PBfusion.106;	PBfusion.106.2;
Pp05	6636930	6638899	-	PBfusion.107;	PBfusion.107.1;
Pp07	5482238	5482838	-	PBfusion.107;	PBfusion.107.2;
Pp04	758213	758872	+	PBfusion.108;	PBfusion.108.1;
scaffold_112	131	3019	-	PBfusion.108;	PBfusion.108.2;
Pp01	21332353	21333052	+	PBfusion.109;	PBfusion.109.1;
Pp02	6653266	6654806	-	PBfusion.109;	PBfusion.109.2;
Pp04	10806467	10806718	+	PBfusion.11;	PBfusion.11.1;
Pp04	25515841	25515872	-	PBfusion.11;	PBfusion.11.2;
Pp06	2151155	2158182	-	PBfusion.110;	PBfusion.110.1;
scaffold_271	661	877	+	PBfusion.110;	PBfusion.110.2;
Pp02	6374640	6375355	+	PBfusion.111;	PBfusion.111.1;
Pp02	6427959	6432688	+	PBfusion.111;	PBfusion.111.2;
Pp04	25525674	25525725	-	PBfusion.112;	PBfusion.112.1;
Pp05	5749601	5750541	+	PBfusion.112;	PBfusion.112.2;
Pp02	6584033	6584074	-	PBfusion.113;	PBfusion.113.1;
Pp03	21821975	21822205	-	PBfusion.113;	PBfusion.113.2;
Pp02	532732	532844	-	PBfusion.114;	PBfusion.114.1;
Pp07	19076596	19080060	+	PBfusion.114;	PBfusion.114.2;
Pp04	6564706	6565235	+	PBfusion.115;	PBfusion.115.1;
Pp08	16926546	16927800	+	PBfusion.115;	PBfusion.115.2;
Pp07	20924882	20925857	+	PBfusion.116;	PBfusion.116.1;
Pp08	17381754	17384815	+	PBfusion.116;	PBfusion.116.2;
Pp04	758213	758750	+	PBfusion.117;	PBfusion.117.1;
scaffold_112	131	2914	-	PBfusion.117;	PBfusion.117.2;
Pp01	10735561	10737039	-	PBfusion.118;	PBfusion.118.1;
Pp03	25916628	25916901	+	PBfusion.118;	PBfusion.118.2;
Pp04	758213	758870	+	PBfusion.119;	PBfusion.119.1;
scaffold_112	131	3024	-	PBfusion.119;	PBfusion.119.2;
Pp05	12973150	12973673	-	PBfusion.12;	PBfusion.12.1;
Pp05	14882507	14885837	-	PBfusion.12;	PBfusion.12.2;
Pp01	28688885	28691529	-	PBfusion.120;	PBfusion.120.1;
Pp04	8874118	8876387	-	PBfusion.120;	PBfusion.120.2;
Pp02	10811744	10819358	-	PBfusion.121;	PBfusion.121.1;
Pp02	18938678	18939100	-	PBfusion.121;	PBfusion.121.2;
Pp04	1315845	1316216	-	PBfusion.122;	PBfusion.122.1;
Pp05	5069537	5074549	-	PBfusion.122;	PBfusion.122.2;
Pp01	13101697	13106680	-	PBfusion.123;	PBfusion.123.1;
Pp08	2933335	2933442	+	PBfusion.123;	PBfusion.123.2;
Pp04	2194896	2195440	-	PBfusion.124;	PBfusion.124.1;
Pp04	25515831	25515873	-	PBfusion.124;	PBfusion.124.2;
Pp01	10732450	10733295	+	PBfusion.125;	PBfusion.125.1;
Pp08	4062061	4073848	+	PBfusion.125;	PBfusion.125.2;
Pp01	47692665	47698947	+	PBfusion.126;	PBfusion.126.1;
Pp02	20385406	20385535	-	PBfusion.126;	PBfusion.126.2;
Pp02	24903279	24903538	-	PBfusion.127;	PBfusion.127.1;
Pp04	25555317	25555390	-	PBfusion.127;	PBfusion.127.2;
Pp06	6620755	6624128	+	PBfusion.128;	PBfusion.128.1;
scaffold_73	3041	5005	-	PBfusion.128;	PBfusion.128.2;
Pp04	758213	758878	+	PBfusion.129;	PBfusion.129.1;
scaffold_112	131	3018	-	PBfusion.129;	PBfusion.129.2;
Pp07	13240882	13241896	-	PBfusion.13;	PBfusion.13.1;
Pp07	13269503	13274944	-	PBfusion.13;	PBfusion.13.2;
Pp03	22180423	22181258	+	PBfusion.130;	PBfusion.130.1;
Pp03	27272484	27288576	-	PBfusion.130;	PBfusion.130.2;
Pp07	18991746	18997469	-	PBfusion.131;	PBfusion.131.1;
scaffold_192	3483	3599	-	PBfusion.131;	PBfusion.131.2;
Pp07	824059	824575	-	PBfusion.132;	PBfusion.132.1;
Pp08	17659533	17661310	-	PBfusion.132;	PBfusion.132.2;
Pp04	16202104	16203557	-	PBfusion.133;	PBfusion.133.1;
Pp04	25684821	25686254	-	PBfusion.133;	PBfusion.133.2;
Pp03	19449214	19451315	-	PBfusion.134;	PBfusion.134.1;
Pp04	8415356	8415610	-	PBfusion.134;	PBfusion.134.2;
Pp01	42894339	42895265	+	PBfusion.135;	PBfusion.135.1;
Pp04	25515826	25515874	-	PBfusion.135;	PBfusion.135.2;
Pp01	47309993	47312925	+	PBfusion.136;	PBfusion.136.1;
Pp08	2933311	2933437	+	PBfusion.136;	PBfusion.136.2;
Pp04	1407094	1409817	+	PBfusion.137;	PBfusion.137.1;
Pp06	29575421	29575572	-	PBfusion.137;	PBfusion.137.2;
Pp04	25583929	25584043	-	PBfusion.138;	PBfusion.138.1;
Pp06	25962974	25965290	+	PBfusion.138;	PBfusion.138.2;
Pp02	6374373	6375318	+	PBfusion.139;	PBfusion.139.1;
Pp02	6427900	6432005	+	PBfusion.139;	PBfusion.139.2;
Pp01	11195142	11195586	+	PBfusion.14;	PBfusion.14.1;
Pp03	9623839	9623942	+	PBfusion.14;	PBfusion.14.2;
Pp01	29896685	29896854	-	PBfusion.140;	PBfusion.140.1;
Pp01	37929391	37931721	+	PBfusion.140;	PBfusion.140.2;
Pp06	2151178	2158179	-	PBfusion.141;	PBfusion.141.1;
scaffold_271	639	874	+	PBfusion.141;	PBfusion.141.2;
Pp02	1935634	1935697	-	PBfusion.142;	PBfusion.142.1;
Pp02	8404886	8406000	+	PBfusion.142;	PBfusion.142.2;
Pp01	13361836	13363279	+	PBfusion.143;	PBfusion.143.1;
Pp02	2318264	2318496	+	PBfusion.143;	PBfusion.143.2;
Pp01	5578060	5578232	-	PBfusion.144;	PBfusion.144.1;
Pp05	128717	128796	+	PBfusion.144;	PBfusion.144.2;
Pp02	24155954	24156020	+	PBfusion.145;	PBfusion.145.1;
Pp04	25516000	25516076	-	PBfusion.145;	PBfusion.145.2;
Pp01	20317813	20318308	+	PBfusion.146;	PBfusion.146.1;
Pp02	16140353	16142368	+	PBfusion.146;	PBfusion.146.2;
Pp01	27693302	27693502	+	PBfusion.147;	PBfusion.147.1;
Pp02	1937433	1937465	+	PBfusion.147;	PBfusion.147.2;
Pp01	3292990	3295203	+	PBfusion.148;	PBfusion.148.1;
Pp02	22465644	22465833	+	PBfusion.148;	PBfusion.148.2;
Pp02	3562689	3565075	-	PBfusion.15;	PBfusion.15.1;
Pp05	1477179	1477342	-	PBfusion.15;	PBfusion.15.2;
Pp01	40986091	40986829	+	PBfusion.16;	PBfusion.16.1;
Pp07	16129644	16131003	-	PBfusion.16;	PBfusion.16.2;
Pp08	2476429	2476976	+	PBfusion.17;	PBfusion.17.1;
Pp08	2503737	2507284	+	PBfusion.17;	PBfusion.17.2;
Pp07	16488800	16490745	-	PBfusion.18;	PBfusion.18.1;
scaffold_191	833	3115	-	PBfusion.18;	PBfusion.18.2;
Pp01	9541629	9542484	+	PBfusion.19;	PBfusion.19.1;
Pp01	39107638	39107716	+	PBfusion.19;	PBfusion.19.2;
Pp01	21087626	21087954	+	PBfusion.2;	PBfusion.2.1;
Pp07	15478880	15481245	-	PBfusion.2;	PBfusion.2.2;
Pp03	25239356	25240373	+	PBfusion.20;	PBfusion.20.1;
Pp08	10971729	10972655	-	PBfusion.20;	PBfusion.20.2;
Pp04	25650497	25650734	-	PBfusion.21;	PBfusion.21.1;
Pp05	12062016	12062350	+	PBfusion.21;	PBfusion.21.2;
Pp07	15159052	15164319	+	PBfusion.22;	PBfusion.22.1;
Pp07	15273929	15274114	+	PBfusion.22;	PBfusion.22.2;
Pp02	29280464	29283690	+	PBfusion.23;	PBfusion.23.1;
Pp08	15406223	15406591	+	PBfusion.23;	PBfusion.23.2;
Pp01	6801357	6801456	+	PBfusion.24;	PBfusion.24.1;
Pp03	201576	203715	+	PBfusion.24;	PBfusion.24.2;
Pp07	823945	824348	-	PBfusion.25;	PBfusion.25.1;
Pp07	9161975	9183181	+	PBfusion.25;	PBfusion.25.2;
Pp01	6460121	6460268	-	PBfusion.26;	PBfusion.26.1;
Pp01	46114795	46116981	+	PBfusion.26;	PBfusion.26.2;
Pp01	13763184	13763359	-	PBfusion.27;	PBfusion.27.1;
Pp02	5472619	5474892	+	PBfusion.27;	PBfusion.27.2;
Pp01	5755035	5755137	+	PBfusion.28;	PBfusion.28.1;
Pp04	4639828	4640564	-	PBfusion.28;	PBfusion.28.2;
Pp01	8123187	8123648	-	PBfusion.29;	PBfusion.29.1;
Pp04	25515998	25516066	-	PBfusion.29;	PBfusion.29.2;
Pp02	25073550	25077244	+	PBfusion.3;	PBfusion.3.1;
Pp07	824237	824866	-	PBfusion.3;	PBfusion.3.2;
Pp08	12566185	12566527	-	PBfusion.30;	PBfusion.30.1;
Pp08	22180451	22184720	-	PBfusion.30;	PBfusion.30.2;
Pp04	15872261	15872455	+	PBfusion.31;	PBfusion.31.1;
Pp05	2222594	2226840	+	PBfusion.31;	PBfusion.31.2;
Pp01	5626675	5630812	+	PBfusion.32;	PBfusion.32.1;
Pp02	1909145	1909344	-	PBfusion.32;	PBfusion.32.2;
Pp02	27943705	27944529	-	PBfusion.33;	PBfusion.33.1;
Pp06	28120160	28122866	-	PBfusion.33;	PBfusion.33.2;
Pp02	7098563	7098758	-	PBfusion.34;	PBfusion.34.1;
Pp08	573073	576144	+	PBfusion.34;	PBfusion.34.2;
Pp04	25628854	25629502	-	PBfusion.35;	PBfusion.35.1;
Pp06	19356856	19358686	+	PBfusion.35;	PBfusion.35.2;
Pp02	15478448	15478542	+	PBfusion.36;	PBfusion.36.1;
Pp06	721727	722946	+	PBfusion.36;	PBfusion.36.2;
Pp06	6618803	6624133	+	PBfusion.37;	PBfusion.37.1;
scaffold_73	3041	5005	-	PBfusion.37;	PBfusion.37.2;
Pp01	13363472	13363601	+	PBfusion.38;	PBfusion.38.1;
Pp02	15332600	15334515	-	PBfusion.38;	PBfusion.38.2;
Pp06	6620724	6624132	+	PBfusion.39;	PBfusion.39.1;
scaffold_73	4919	5005	-	PBfusion.39;	PBfusion.39.2;
Pp02	23246136	23247782	-	PBfusion.4;	PBfusion.4.1;
Pp06	25144643	25145181	+	PBfusion.4;	PBfusion.4.2;
Pp01	38091954	38092258	-	PBfusion.40;	PBfusion.40.1;
Pp07	12248678	12257337	+	PBfusion.40;	PBfusion.40.2;
Pp01	46488622	46489107	+	PBfusion.41;	PBfusion.41.1;
Pp04	25626452	25626596	-	PBfusion.41;	PBfusion.41.2;
Pp03	8910014	8910920	+	PBfusion.42;	PBfusion.42.1;
Pp04	17690629	17691945	+	PBfusion.42;	PBfusion.42.2;
Pp02	2401082	2402659	+	PBfusion.43;	PBfusion.43.1;
Pp06	7039316	7039624	+	PBfusion.43;	PBfusion.43.2;
Pp02	21065720	21066368	+	PBfusion.44;	PBfusion.44.1;
Pp02	29280092	29283757	+	PBfusion.44;	PBfusion.44.2;
Pp01	9025183	9025488	-	PBfusion.45;	PBfusion.45.1;
Pp04	11140394	11140474	+	PBfusion.45;	PBfusion.45.2;
Pp04	7743674	7743960	+	PBfusion.46;	PBfusion.46.1;
Pp04	25629168	25629831	-	PBfusion.46;	PBfusion.46.2;
Pp01	11654723	11661075	-	PBfusion.47;	PBfusion.47.1;
Pp07	21639417	21639632	-	PBfusion.47;	PBfusion.47.2;
Pp01	45860662	45874255	+	PBfusion.48;	PBfusion.48.1;
Pp02	6735822	6740202	+	PBfusion.48;	PBfusion.48.2;
Pp04	758213	758889	+	PBfusion.49;	PBfusion.49.1;
scaffold_112	131	2910	-	PBfusion.49;	PBfusion.49.2;
Pp04	1315845	1316216	-	PBfusion.5;	PBfusion.5.1;
Pp05	5068838	5074543	-	PBfusion.5;	PBfusion.5.2;
Pp06	15231423	15231724	-	PBfusion.50;	PBfusion.50.1;
Pp06	26887057	26890838	-	PBfusion.50;	PBfusion.50.2;
Pp02	29846326	29846536	-	PBfusion.51;	PBfusion.51.1;
Pp04	2089978	2090380	+	PBfusion.51;	PBfusion.51.2;
Pp02	3779276	3779337	-	PBfusion.52;	PBfusion.52.1;
Pp07	9910817	9911386	+	PBfusion.52;	PBfusion.52.2;
Pp02	2210011	2217744	+	PBfusion.53;	PBfusion.53.1;
Pp02	7195770	7195934	-	PBfusion.53;	PBfusion.53.2;
Pp06	2151155	2157982	-	PBfusion.54;	PBfusion.54.1;
scaffold_271	661	818	+	PBfusion.54;	PBfusion.54.2;
Pp01	321304	321560	-	PBfusion.55;	PBfusion.55.1;
scaffold_71	8946	10316	-	PBfusion.55;	PBfusion.55.2;
Pp06	10326055	10329110	-	PBfusion.56;	PBfusion.56.1;
Pp08	18889642	18893003	+	PBfusion.56;	PBfusion.56.2;
Pp01	30112771	30117331	-	PBfusion.57;	PBfusion.57.1;
Pp04	25697980	25698217	-	PBfusion.57;	PBfusion.57.2;
Pp01	30018365	30024263	-	PBfusion.58;	PBfusion.58.1;
Pp03	6749094	6751219	+	PBfusion.58;	PBfusion.58.2;
Pp04	5257463	5260679	+	PBfusion.59;	PBfusion.59.1;
Pp05	8360233	8363120	+	PBfusion.59;	PBfusion.59.2;
Pp04	758213	758967	+	PBfusion.6;	PBfusion.6.1;
scaffold_112	131	2914	-	PBfusion.6;	PBfusion.6.2;
Pp01	25427399	25431256	-	PBfusion.60;	PBfusion.60.1;
Pp05	8360233	8363268	+	PBfusion.60;	PBfusion.60.2;
Pp04	14748266	14748764	-	PBfusion.61;	PBfusion.61.1;
Pp04	25534757	25534822	-	PBfusion.61;	PBfusion.61.2;
Pp01	15765816	15766769	-	PBfusion.62;	PBfusion.62.1;
Pp04	19432887	19434216	-	PBfusion.62;	PBfusion.62.2;
Pp04	9451908	9454908	+	PBfusion.63;	PBfusion.63.1;
Pp06	2197903	2198141	+	PBfusion.63;	PBfusion.63.2;
Pp04	758048	758972	+	PBfusion.64;	PBfusion.64.1;
scaffold_112	18	2914	-	PBfusion.64;	PBfusion.64.2;
Pp06	6620755	6624128	+	PBfusion.65;	PBfusion.65.1;
scaffold_73	4919	5005	-	PBfusion.65;	PBfusion.65.2;
Pp01	20317441	20318308	+	PBfusion.66;	PBfusion.66.1;
Pp02	16140353	16142368	+	PBfusion.66;	PBfusion.66.2;
Pp01	20318121	20318308	+	PBfusion.67;	PBfusion.67.1;
Pp02	16140353	16142368	+	PBfusion.67;	PBfusion.67.2;
Pp03	5032191	5033196	-	PBfusion.68;	PBfusion.68.1;
Pp08	15025091	15025234	-	PBfusion.68;	PBfusion.68.2;
Pp02	27744268	27748209	+	PBfusion.69;	PBfusion.69.1;
Pp08	20646137	20646523	-	PBfusion.69;	PBfusion.69.2;
Pp01	20317915	20318308	+	PBfusion.7;	PBfusion.7.1;
Pp02	16140353	16142367	+	PBfusion.7;	PBfusion.7.2;
Pp01	17536305	17538635	-	PBfusion.70;	PBfusion.70.1;
Pp01	45427929	45430845	+	PBfusion.70;	PBfusion.70.2;
Pp05	4920454	4925849	-	PBfusion.71;	PBfusion.71.1;
Pp05	4950852	4953215	-	PBfusion.71;	PBfusion.71.2;
Pp01	430779	440920	+	PBfusion.72;	PBfusion.72.1;
Pp04	20119999	20120127	-	PBfusion.72;	PBfusion.72.2;
Pp04	11437506	11437738	-	PBfusion.73;	PBfusion.73.1;
Pp07	1088144	1091119	+	PBfusion.73;	PBfusion.73.2;
Pp04	9186811	9186850	-	PBfusion.74;	PBfusion.74.1;
Pp04	18266284	18266796	+	PBfusion.74;	PBfusion.74.2;
Pp04	16790984	16792633	+	PBfusion.75;	PBfusion.75.1;
Pp07	13033230	13033845	-	PBfusion.75;	PBfusion.75.2;
Pp03	19381985	19382392	-	PBfusion.76;	PBfusion.76.1;
Pp06	25729594	25734189	+	PBfusion.76;	PBfusion.76.2;
Pp02	7098565	7098758	-	PBfusion.77;	PBfusion.77.1;
Pp08	573103	576144	+	PBfusion.77;	PBfusion.77.2;
Pp02	6374373	6375346	+	PBfusion.78;	PBfusion.78.1;
Pp02	6430709	6432005	+	PBfusion.78;	PBfusion.78.2;
Pp04	2646684	2648505	+	PBfusion.79;	PBfusion.79.1;
Pp07	1312628	1313380	-	PBfusion.79;	PBfusion.79.2;
Pp01	21034571	21044502	+	PBfusion.8;	PBfusion.8.1;
Pp05	2732399	2732559	-	PBfusion.8;	PBfusion.8.2;
Pp04	758213	759065	+	PBfusion.80;	PBfusion.80.1;
scaffold_112	131	3018	-	PBfusion.80;	PBfusion.80.2;
Pp02	15717853	15717955	+	PBfusion.81;	PBfusion.81.1;
Pp06	30643854	30647934	+	PBfusion.81;	PBfusion.81.2;
Pp01	8869548	8869734	-	PBfusion.82;	PBfusion.82.1;
Pp02	17903437	17906003	-	PBfusion.82;	PBfusion.82.2;
Pp01	13228070	13228170	-	PBfusion.83;	PBfusion.83.1;
Pp01	33036724	33037149	+	PBfusion.83;	PBfusion.83.2;
Pp02	18985700	18986447	-	PBfusion.84;	PBfusion.84.1;
Pp04	25533469	25533525	-	PBfusion.84;	PBfusion.84.2;
Pp01	45178435	45185031	-	PBfusion.85;	PBfusion.85.1;
Pp03	20397351	20397587	-	PBfusion.85;	PBfusion.85.2;
Pp04	1398443	1398634	+	PBfusion.86;	PBfusion.86.1;
Pp06	7144862	7153954	+	PBfusion.86;	PBfusion.86.2;
Pp04	25546300	25546474	-	PBfusion.87;	PBfusion.87.1;
Pp06	8918032	8918195	-	PBfusion.87;	PBfusion.87.2;
Pp02	28974118	28975344	+	PBfusion.88;	PBfusion.88.1;
Pp07	21929375	21930094	+	PBfusion.88;	PBfusion.88.2;
Pp02	29835679	29840096	-	PBfusion.89;	PBfusion.89.1;
Pp04	2432395	2432746	-	PBfusion.89;	PBfusion.89.2;
Pp08	2476113	2476970	+	PBfusion.9;	PBfusion.9.1;
Pp08	2503772	2507081	+	PBfusion.9;	PBfusion.9.2;
Pp01	24816998	24817096	-	PBfusion.90;	PBfusion.90.1;
Pp06	30419570	30419957	+	PBfusion.90;	PBfusion.90.2;
Pp06	21222773	21223147	-	PBfusion.91;	PBfusion.91.1;
Pp06	21250176	21257954	+	PBfusion.91;	PBfusion.91.2;
Pp06	2151155	2158169	-	PBfusion.92;	PBfusion.92.1;
scaffold_271	661	874	+	PBfusion.92;	PBfusion.92.2;
Pp01	30554302	30556368	-	PBfusion.93;	PBfusion.93.1;
Pp04	25707049	25707560	-	PBfusion.93;	PBfusion.93.2;
Pp04	4611772	4612068	-	PBfusion.94;	PBfusion.94.1;
Pp04	4632704	4636315	-	PBfusion.94;	PBfusion.94.2;
Pp05	4923807	4925671	-	PBfusion.95;	PBfusion.95.1;
Pp05	4950852	4956629	-	PBfusion.95;	PBfusion.95.2;
Pp01	42869103	42874333	+	PBfusion.96;	PBfusion.96.1;
Pp08	6722072	6723238	-	PBfusion.96;	PBfusion.96.2;
Pp04	12262972	12263707	-	PBfusion.97;	PBfusion.97.1;
Pp06	25731077	25734130	+	PBfusion.97;	PBfusion.97.2;
Pp04	25735258	25735499	-	PBfusion.98;	PBfusion.98.1;
Pp08	15416335	15418362	+	PBfusion.98;	PBfusion.98.2;
Pp06	2151155	2158179	-	PBfusion.99;	PBfusion.99.1;
scaffold_271	661	839	+	PBfusion.99;	PBfusion.99.2;
