# Supplementary material
Source: MDPI journal article supplement (https://www.mdpi.com/2311-7524/9/2/175)
Supplement: s1 [file s1 › Table S3.xlsx]

## Sheet: TF_classification
Table S3 List of candidate TF transcripts
Transcript ID	Family	Type	Chromosome	Start	End
PB.10004.1	MYB	TF	Pp05	17581441	17587650
PB.10039.4	Tify	TF	Pp05	17832070	17834171
PB.10059.1	GNAT	TR	Pp05	18026022	18029054
PB.10071.2	PHD	TR	Pp05	18118119	18120961
PB.10071.3	PHD	TR	Pp05	18118119	18120786
PB.10071.4	PHD	TR	Pp05	18118197	18120413
PB.10074.3	MYB-related	TF	Pp05	18157055	18162206
PB.10106.1	SNF2	TR	Pp06	68945	103319
PB.1013.1	FAR1	TF	Pp01	18684596	18690423
PB.10208.2	EIL	TF	Pp06	1324447	1327259
PB.10309.1	HMG	TR	Pp06	2653202	2657534
PB.10316.3	WRKY	TF	Pp06	2737068	2742249
PB.10316.5	WRKY	TF	Pp06	2737173	2742240
PB.10352.3	B3	TF	Pp06	3041506	3048282
PB.10352.4	B3	TF	Pp06	3041506	3048437
PB.10355.2	bZIP	TF	Pp06	3060366	3063168
PB.10357.1	MYB-related	TF	Pp06	3069538	3073460
PB.1040.2	RWP-RK	TF	Pp01	19544209	19551702
PB.1040.4	RWP-RK	TF	Pp01	19544212	19551705
PB.1040.6	RWP-RK	TF	Pp01	19544212	19551704
PB.1040.8	RWP-RK	TF	Pp01	19544221	19551529
PB.1040.9	RWP-RK	TF	Pp01	19544413	19551704
PB.10495.1	AP2/ERF-ERF	TF	Pp06	4478642	4482569
PB.10495.3	AP2/ERF-ERF	TF	Pp06	4478651	4482541
PB.10495.4	AP2/ERF-ERF	TF	Pp06	4478652	4482447
PB.10540.2	GARP-G2-like	TF	Pp06	4872910	4876109
PB.10540.3	GARP-G2-like	TF	Pp06	4873915	4876109
PB.10554.1	GRAS	TF	Pp06	5005441	5008396
PB.10554.3	GRAS	TF	Pp06	5005499	5008270
PB.10557.1	GRAS	TF	Pp06	5044628	5047769
PB.10557.2	GRAS	TF	Pp06	5044795	5047664
PB.10559.5	MYB-related	TF	Pp06	5059936	5065390
PB.10587.1	C2C2-Dof	TF	Pp06	5416374	5417906
PB.10614.1	MYB-related	TF	Pp06	5730865	5732404
PB.10667.3	C2C2-Dof	TF	Pp06	6385114	6387350
PB.10692.11	PHD	TR	Pp06	6746640	6759104
PB.10692.5	PHD	TR	Pp06	6746579	6750746
PB.10699.2	AUX/IAA	TR	Pp06	6797575	6804257
PB.10699.3	AUX/IAA	TR	Pp06	6797576	6804326
PB.10699.4	B3-ARF	TF	Pp06	6797581	6804322
PB.10703.2	C2H2	TF	Pp06	6877269	6880066
PB.10703.3	C2H2	TF	Pp06	6877274	6879799
PB.10703.4	C2H2	TF	Pp06	6877274	6879947
PB.10703.5	C2H2	TF	Pp06	6877410	6879801
PB.10731.1	C2C2-GATA	TF	Pp06	7176781	7180590
PB.10901.1	NAC	TF	Pp06	10621105	10622583
PB.1093.1	SET	TR	Pp01	22415952	22418846
PB.1093.2	SET	TR	Pp01	22415952	22419408
PB.1093.3	SET	TR	Pp01	22415952	22419352
PB.1093.4	SET	TR	Pp01	22415955	22417558
PB.1093.5	SET	TR	Pp01	22415975	22418983
PB.10943.10	HB-BELL	TF	Pp06	11846796	11850747
PB.10943.2	HB-BELL	TF	Pp06	11846698	11850909
PB.10943.3	HB-BELL	TF	Pp06	11846768	11850883
PB.10943.4	HB-BELL	TF	Pp06	11846791	11850914
PB.11000.1	bZIP	TF	Pp06	13711881	13718346
PB.11000.3	bZIP	TF	Pp06	13712032	13718411
PB.11016.2	C3H	TF	Pp06	14544203	14554024
PB.11016.4	C3H	TF	Pp06	14544203	14554028
PB.11036.1	Trihelix	TF	Pp06	15425162	15427395
PB.11064.1	WRKY	TF	Pp06	17235802	17239791
PB.11098.3	mTERF	TR	Pp06	18005773	18009928
PB.11103.2	bZIP	TF	Pp06	18207380	18213342
PB.11163.1	C2H2	TF	Pp06	19660806	19662933
PB.11163.2	C2H2	TF	Pp06	19660806	19662119
PB.11192.2	HB-HD-ZIP	TF	Pp06	20066278	20068976
PB.11192.3	HB-HD-ZIP	TF	Pp06	20066279	20068982
PB.11192.5	HB-HD-ZIP	TF	Pp06	20066416	20068983
PB.11192.6	HB-HD-ZIP	TF	Pp06	20066417	20068983
PB.11206.1	zf-HD	TF	Pp06	20377385	20379023
PB.11258.2	bHLH	TF	Pp06	21860972	21861992
PB.11260.1	AUX/IAA	TR	Pp06	21881756	21886932
PB.11260.6	AUX/IAA	TR	Pp06	21882777	21886845
PB.11260.7	AUX/IAA	TR	Pp06	21883065	21886932
PB.11295.1	AP2/ERF-ERF	TF	Pp06	22378875	22382685
PB.11295.2	AP2/ERF-AP2	TF	Pp06	22378875	22382685
PB.11295.4	AP2/ERF-AP2	TF	Pp06	22378977	22382685
PB.11297.1	GRF	TF	Pp06	22407790	22411297
PB.11311.1	GNAT	TR	Pp06	22575876	22581120
PB.11311.2	GNAT	TR	Pp06	22575876	22581076
PB.11311.5	GNAT	TR	Pp06	22575998	22581076
PB.11313.3	MYB-related	TF	Pp06	22585591	22589229
PB.11396.1	AP2/ERF-ERF	TF	Pp06	23411347	23412682
PB.11397.4	AP2/ERF-AP2	TF	Pp06	23428288	23431833
PB.11397.5	AP2/ERF-ERF	TF	Pp06	23428288	23431738
PB.11397.6	AP2/ERF-AP2	TF	Pp06	23428288	23431833
PB.11408.2	MYB-related	TF	Pp06	23507669	23515425
PB.11415.1	TCP	TF	Pp06	23576364	23577782
PB.11420.10	MYB-related	TF	Pp06	23610838	23615912
PB.11420.12	MYB-related	TF	Pp06	23610838	23615967
PB.11420.14	MYB-related	TF	Pp06	23610838	23615967
PB.11420.17	MYB-related	TF	Pp06	23610841	23615996
PB.11420.18	MYB-related	TF	Pp06	23610842	23615967
PB.11420.4	MYB-related	TF	Pp06	23610739	23616019
PB.11448.1	C2H2	TF	Pp06	23821250	23824085
PB.11448.3	C2H2	TF	Pp06	23821309	23824093
PB.11448.7	C2H2	TF	Pp06	23821539	23824171
PB.11477.1	AP2/ERF-AP2	TF	Pp06	24074521	24077964
PB.11479.2	MYB-related	TF	Pp06	24104691	24107895
PB.11479.3	MYB-related	TF	Pp06	24104691	24108058
PB.11479.5	MYB-related	TF	Pp06	24104728	24107895
PB.11479.6	MYB-related	TF	Pp06	24104748	24107895
PB.11481.2	C3H	TF	Pp06	24116786	24119502
PB.11488.10	Others	TR	Pp06	24182462	24188161
PB.11488.11	Pseudo ARR-B	TR	Pp06	24182462	24188140
PB.11488.12	Pseudo ARR-B	TR	Pp06	24182462	24188177
PB.11488.13	Others	TR	Pp06	24182464	24188216
PB.11488.14	Others	TR	Pp06	24182464	24188141
PB.11488.15	Others	TR	Pp06	24185212	24188143
PB.11488.3	Others	TR	Pp06	24182386	24188142
PB.11488.4	Pseudo ARR-B	TR	Pp06	24182388	24188206
PB.11488.6	Others	TR	Pp06	24182412	24188300
PB.11488.7	Others	TR	Pp06	24182454	24188203
PB.11488.8	Others	TR	Pp06	24182454	24188204
PB.11488.9	Others	TR	Pp06	24182458	24188278
PB.11489.1	WRKY	TF	Pp06	24198008	24203231
PB.11489.4	WRKY	TF	Pp06	24198088	24203198
PB.11489.6	WRKY	TF	Pp06	24198409	24203191
PB.1151.2	Others	TR	Pp01	23420990	23424075
PB.11527.3	PHD	TR	Pp06	24564039	24570461
PB.11538.2	Others	TR	Pp06	24647524	24651537
PB.1155.2	NAC	TF	Pp01	23497808	23499527
PB.1155.3	NAC	TF	Pp01	23497834	23499531
PB.1155.4	NAC	TF	Pp01	23498490	23499531
PB.11558.2	MYB	TF	Pp06	24864557	24868337
PB.1164.2	TCP	TF	Pp01	23628266	23629520
PB.11678.1	HMG	TR	Pp06	25999497	26001956
PB.1172.3	SBP	TF	Pp01	23739051	23742158
PB.11744.2	WRKY	TF	Pp06	26503636	26505957
PB.11787.5	B3	TF	Pp06	26966645	26972640
PB.11787.7	B3	TF	Pp06	26966696	26972678
PB.11810.2	GNAT	TR	Pp06	27112923	27115521
PB.11812.1	GNAT	TR	Pp06	27153989	27156420
PB.1183.11	SBP	TF	Pp01	23866118	23869418
PB.1183.12	SBP	TF	Pp01	23866118	23869459
PB.1183.15	SBP	TF	Pp01	23866399	23870364
PB.1183.3	SBP	TF	Pp01	23865051	23870041
PB.1183.5	SBP	TF	Pp01	23865069	23869331
PB.1183.9	SBP	TF	Pp01	23865508	23869735
PB.11856.2	MYB	TF	Pp06	27479843	27481882
PB.11858.1	bHLH	TF	Pp06	27493207	27496171
PB.11858.3	bHLH	TF	Pp06	27493309	27497440
PB.11858.4	bHLH	TF	Pp06	27493309	27497329
PB.11933.1	PHD	TR	Pp06	28166695	28170523
PB.11979.3	Jumonji	TR	Pp06	28476716	28483825
PB.11979.5	Jumonji	TR	Pp06	28476737	28483820
PB.11979.6	Jumonji	TR	Pp06	28476792	28483839
PB.11979.7	Jumonji	TR	Pp06	28476796	28483825
PB.11985.2	MYB-related	TF	Pp06	28524719	28534859
PB.12111.1	Trihelix	TF	Pp06	29457096	29459710
PB.12111.4	Trihelix	TF	Pp06	29457182	29459857
PB.12124.4	bZIP	TF	Pp06	29545330	29548914
PB.12130.3	AUX/IAA	TR	Pp06	29575408	29576742
PB.12130.5	AUX/IAA	TR	Pp06	29575454	29576742
PB.12130.6	AUX/IAA	TR	Pp06	29575512	29576745
PB.12131.2	AUX/IAA	TR	Pp06	29583241	29585197
PB.12131.5	AUX/IAA	TR	Pp06	29583325	29585131
PB.12166.5	MYB	TF	Pp06	29816764	29819490
PB.12180.1	GARP-G2-like	TF	Pp06	29921215	29925525
PB.12182.1	SET	TR	Pp06	29932333	29936314
PB.12184.4	SNF2	TR	Pp06	29946547	29959536
PB.12184.5	SNF2	TR	Pp06	29946547	29959534
PB.12239.1	C3H	TF	Pp06	30427747	30431624
PB.12239.3	C3H	TF	Pp06	30427847	30431602
PB.12239.4	C3H	TF	Pp06	30427849	30431567
PB.12239.6	C3H	TF	Pp06	30427871	30431624
PB.12239.7	C3H	TF	Pp06	30427874	30431574
PB.12239.8	C3H	TF	Pp06	30427876	30431574
PB.12362.1	C3H	TF	Pp07	1902368	1903964
PB.12365.2	NAC	TF	Pp07	2010861	2014815
PB.12400.1	SET	TR	Pp07	3137665	3140826
PB.12400.5	SET	TR	Pp07	3137830	3142463
PB.1244.1	Trihelix	TF	Pp01	24892799	24897075
PB.1244.4	Trihelix	TF	Pp01	24892804	24897058
PB.12447.4	IWS1	TR	Pp07	5326135	5330123
PB.12447.5	IWS1	TR	Pp07	5326139	5330224
PB.12449.2	SNF2	TR	Pp07	5368811	5374402
PB.12476.4	bZIP	TF	Pp07	7041884	7050160
PB.12476.5	bZIP	TF	Pp07	7041884	7050158
PB.12476.7	bZIP	TF	Pp07	7041937	7050160
PB.12476.9	bZIP	TF	Pp07	7042737	7050221
PB.12492.1	Others	TR	Pp07	7760285	7762335
PB.12551.2	SNF2	TR	Pp07	9161975	9183181
PB.12602.1	C2H2	TF	Pp07	10206509	10217440
PB.12602.2	C2H2	TF	Pp07	10213636	10217493
PB.12602.3	C2H2	TF	Pp07	10213651	10217474
PB.12602.5	C2H2	TF	Pp07	10213672	10217471
PB.12602.6	C2H2	TF	Pp07	10213681	10217440
PB.12646.3	bHLH	TF	Pp07	10802338	10807938
PB.12677.2	mTERF	TR	Pp07	11203248	11205426
PB.12682.3	MYB-related	TF	Pp07	11282315	11285802
PB.12760.2	Jumonji	TR	Pp07	12346353	12348903
PB.12779.2	NAC	TF	Pp07	12503395	12506998
PB.12791.1	TRAF	TR	Pp07	12679439	12682336
PB.12792.1	HB-BELL	TF	Pp07	12683099	12687955
PB.12792.10	HB-BELL	TF	Pp07	12683270	12687318
PB.12792.11	HB-BELL	TF	Pp07	12683271	12688050
PB.12792.2	HB-BELL	TF	Pp07	12683148	12687736
PB.12792.7	HB-BELL	TF	Pp07	12683194	12687959
PB.12792.9	HB-BELL	TF	Pp07	12683270	12688108
PB.12816.2	E2F-DP	TF	Pp07	12938349	12943296
PB.12863.1	GNAT	TR	Pp07	13786351	13788656
PB.12863.2	GNAT	TR	Pp07	13786432	13788677
PB.12895.2	Trihelix	TF	Pp07	14153106	14155902
PB.12895.3	Trihelix	TF	Pp07	14153121	14155902
PB.12899.3	C2H2	TF	Pp07	14192136	14199389
PB.12910.2	C3H	TF	Pp07	14305003	14307850
PB.12921.2	Trihelix	TF	Pp07	14399743	14403117
PB.12921.3	Trihelix	TF	Pp07	14399791	14403114
PB.12944.2	PHD	TR	Pp07	14617835	14626214
PB.12944.3	PHD	TR	Pp07	14617859	14626095
PB.12989.1	bHLH	TF	Pp07	15053686	15057182
PB.13051.1	B3	TF	Pp07	15786815	15789644
PB.13052.2	B3	TF	Pp07	15790336	15794074
PB.13053.1	B3	TF	Pp07	15798896	15801667
PB.13053.2	B3	TF	Pp07	15800248	15802958
PB.13073.3	Others	TR	Pp07	16008860	16014287
PB.13073.5	Others	TR	Pp07	16008892	16014268
PB.13073.7	Others	TR	Pp07	16008903	16012354
PB.13089.2	BES1	TF	Pp07	16103944	16106552
PB.13089.4	BES1	TF	Pp07	16103963	16106414
PB.13099.2	bZIP	TF	Pp07	16205896	16209825
PB.13119.1	GRAS	TF	Pp07	16382168	16384727
PB.13119.2	GRAS	TF	Pp07	16382170	16384877
PB.13139.2	TUB	TF	Pp07	16516576	16519099
PB.13139.3	TUB	TF	Pp07	16516599	16519094
PB.13174.1	FAR1	TF	Pp07	16745449	16748933
PB.13174.2	FAR1	TF	Pp07	16745451	16748330
PB.13175.3	FAR1	TF	Pp07	16749514	16752512
PB.13208.1	Others	TR	Pp07	16977544	16980377
PB.13218.1	C3H	TF	Pp07	17040269	17044756
PB.13316.1	RWP-RK	TF	Pp07	17726339	17730257
PB.13316.2	RWP-RK	TF	Pp07	17727222	17730300
PB.13321.1	HMG	TR	Pp07	17775223	17776876
PB.13321.2	HMG	TR	Pp07	17775224	17776833
PB.13321.3	HMG	TR	Pp07	17775224	17777468
PB.13351.1	ARID	TR	Pp07	18096370	18102253
PB.13351.3	ARID	TR	Pp07	18096474	18102316
PB.13351.4	ARID	TR	Pp07	18096525	18102221
PB.13404.3	Tify	TF	Pp07	18485310	18487683
PB.13404.4	Tify	TF	Pp07	18486033	18487606
PB.13452.1	NF-YA	TF	Pp07	18876045	18879453
PB.13454.4	Alfin-like	TF	Pp07	18886076	18889256
PB.13472.2	MYB-related	TF	Pp07	19004523	19008395
PB.13490.1	C3H	TF	Pp07	19187387	19191277
PB.13490.2	C3H	TF	Pp07	19187407	19191144
PB.13574.1	mTERF	TR	Pp07	19812938	19814869
PB.13593.2	AUX/IAA	TR	Pp07	19999613	20002861
PB.13593.3	AUX/IAA	TR	Pp07	19999637	20002733
PB.13615.1	Trihelix	TF	Pp07	20172218	20174355
PB.13624.1	C2H2	TF	Pp07	20214881	20217756
PB.13624.2	C2H2	TF	Pp07	20214884	20217756
PB.13624.3	C2H2	TF	Pp07	20214928	20217882
PB.13647.2	CPP	TF	Pp07	20378360	20384055
PB.13653.2	AUX/IAA	TR	Pp07	20438542	20440508
PB.13658.3	LUG	TR	Pp07	20466265	20474535
PB.13658.4	LUG	TR	Pp07	20466268	20474502
PB.13711.1	AP2/ERF-ERF	TF	Pp07	20850310	20851352
PB.13789.3	HB-KNOX	TF	Pp07	21408722	21411185
PB.13803.1	C2H2	TF	Pp07	21476132	21480278
PB.13834.4	bHLH	TF	Pp07	21683491	21687426
PB.13834.6	bHLH	TF	Pp07	21683492	21687305
PB.13834.8	bHLH	TF	Pp07	21683494	21687429
PB.13847.2	WRKY	TF	Pp07	21795753	21800199
PB.13892.1	TAZ	TR	Pp07	22061245	22065131
PB.13892.3	TAZ	TR	Pp07	22061435	22064524
PB.13892.4	TAZ	TR	Pp07	22061436	22064494
PB.13892.5	TRAF	TR	Pp07	22061877	22064526
PB.13922.10	SET	TR	Pp07	22248899	22255654
PB.13922.11	SET	TR	Pp07	22248899	22255627
PB.13922.12	SET	TR	Pp07	22248899	22255628
PB.13922.13	SET	TR	Pp07	22248900	22255633
PB.13922.14	SET	TR	Pp07	22248901	22255590
PB.13922.15	SET	TR	Pp07	22248901	22255638
PB.13922.16	SET	TR	Pp07	22248902	22255621
PB.13922.17	SET	TR	Pp07	22248922	22255628
PB.13922.18	SET	TR	Pp07	22248922	22255534
PB.13922.20	SET	TR	Pp07	22249014	22255625
PB.13922.21	SET	TR	Pp07	22249016	22255621
PB.13922.22	SET	TR	Pp07	22249019	22255621
PB.13922.23	SET	TR	Pp07	22249050	22255621
PB.13922.25	SET	TR	Pp07	22249089	22255629
PB.13922.26	SET	TR	Pp07	22249089	22255640
PB.13922.27	SET	TR	Pp07	22249090	22255654
PB.13922.3	SET	TR	Pp07	22248897	22255621
PB.13922.4	SET	TR	Pp07	22248897	22255606
PB.13922.5	SET	TR	Pp07	22248898	22255529
PB.13922.6	SET	TR	Pp07	22248898	22255621
PB.13922.7	SET	TR	Pp07	22248899	22255640
PB.13922.8	SET	TR	Pp07	22248899	22255638
PB.13922.9	SET	TR	Pp07	22248899	22255621
PB.13941.2	Whirly	TF	Pp08	231518	234197
PB.1395.1	GNAT	TR	Pp01	26808045	26811862
PB.14007.5	GRAS	TF	Pp08	1518957	1522236
PB.14072.3	C3H	TF	Pp08	2567045	2570458
PB.14072.5	C3H	TF	Pp08	2567151	2570456
PB.14074.3	Trihelix	TF	Pp08	2578229	2579434
PB.14075.1	Jumonji	TR	Pp08	2587036	2589661
PB.14076.5	Trihelix	TF	Pp08	2596691	2599673
PB.14080.11	TUB	TF	Pp08	2667339	2672459
PB.14080.2	TUB	TF	Pp08	2665914	2672537
PB.14080.4	TUB	TF	Pp08	2665949	2672566
PB.14080.5	TUB	TF	Pp08	2665969	2672537
PB.14080.6	TUB	TF	Pp08	2665974	2672552
PB.14080.7	TUB	TF	Pp08	2665974	2670145
PB.14080.8	TUB	TF	Pp08	2665975	2672535
PB.14080.9	TUB	TF	Pp08	2665994	2672484
PB.14093.3	bZIP	TF	Pp08	2974189	2979427
PB.14101.1	SET	TR	Pp08	3119916	3123227
PB.14101.2	SET	TR	Pp08	3119916	3123227
PB.14101.3	SET	TR	Pp08	3119916	3123227
PB.14101.6	SET	TR	Pp08	3119919	3123274
PB.14101.8	SET	TR	Pp08	3119925	3123107
PB.14108.3	NAC	TF	Pp08	3255185	3265122
PB.14108.4	NAC	TF	Pp08	3261637	3265121
PB.14108.5	NAC	TF	Pp08	3261646	3265149
PB.14120.1	AP2/ERF-ERF	TF	Pp08	3608266	3610928
PB.14123.1	SET	TR	Pp08	3806630	3819665
PB.14123.2	SET	TR	Pp08	3806709	3819665
PB.14165.3	NAC	TF	Pp08	4838429	4857004
PB.14236.3	C2H2	TF	Pp08	9110963	9115962
PB.14273.1	MADS-MIKC	TF	Pp08	10173239	10180521
PB.14273.4	MADS-MIKC	TF	Pp08	10173497	10180115
PB.14273.5	MADS-MIKC	TF	Pp08	10173504	10180456
PB.14273.7	MADS-M-type	TF	Pp08	10173519	10180456
PB.14287.2	C2C2-GATA	TF	Pp08	10424778	10429766
PB.14287.4	C2C2-GATA	TF	Pp08	10424781	10429639
PB.14288.1	Tify	TF	Pp08	10432949	10437704
PB.14344.1	BBR-BPC	TF	Pp08	11616903	11620744
PB.14364.3	C2C2-GATA	TF	Pp08	11911016	11912344
PB.14367.2	RB	TR	Pp08	11963638	11974623
PB.14367.6	RB	TR	Pp08	11963766	11974588
PB.14382.1	PHD	TR	Pp08	12268700	12273252
PB.14386.8	HB-BELL	TF	Pp08	12309327	12315385
PB.14387.3	SNF2	TR	Pp08	12322252	12330305
PB.14411.1	bHLH	TF	Pp08	12777062	12780463
PB.14417.3	mTERF	TR	Pp08	12882748	12886863
PB.14417.4	mTERF	TR	Pp08	12882750	12886850
PB.14417.5	mTERF	TR	Pp08	12882875	12886862
PB.14450.1	bZIP	TF	Pp08	13353280	13358160
PB.14450.3	bZIP	TF	Pp08	13353467	13358197
PB.1447.2	HB-HD-ZIP	TF	Pp01	27479089	27481330
PB.14496.1	B3	TF	Pp08	14150521	14153890
PB.14496.3	B3	TF	Pp08	14150628	14153924
PB.14496.5	B3	TF	Pp08	14150659	14153890
PB.14496.6	B3	TF	Pp08	14150774	14153969
PB.14515.2	SWI/SNF-BAF60b	TR	Pp08	14319551	14325271
PB.14515.4	SWI/SNF-BAF60b	TR	Pp08	14320309	14325271
PB.14515.5	SWI/SNF-BAF60b	TR	Pp08	14320309	14325271
PB.14516.4	GARP-G2-like	TF	Pp08	14336612	14339714
PB.14557.3	bZIP	TF	Pp08	15094263	15097689
PB.1458.1	Whirly	TF	Pp01	27624581	27627238
PB.1458.2	Whirly	TF	Pp01	27624583	27627272
PB.14667.2	MYB-related	TF	Pp08	16176080	16183240
PB.14667.4	MYB-related	TF	Pp08	16177017	16183292
PB.1468.2	HB-HD-ZIP	TF	Pp01	27837725	27839831
PB.1468.4	HB-HD-ZIP	TF	Pp01	27837931	27840038
PB.14762.2	bZIP	TF	Pp08	17192689	17196183
PB.14762.3	bZIP	TF	Pp08	17192760	17196349
PB.14762.4	bZIP	TF	Pp08	17192760	17195580
PB.14762.5	bZIP	TF	Pp08	17192760	17196211
PB.14762.7	bZIP	TF	Pp08	17192760	17196198
PB.14762.8	bZIP	TF	Pp08	17192764	17195341
PB.14774.1	bHLH	TF	Pp08	17274247	17277832
PB.1478.2	TCP	TF	Pp01	27914116	27916226
PB.1478.3	TCP	TF	Pp01	27914221	27916089
PB.1478.4	TCP	TF	Pp01	27914332	27916226
PB.14862.2	ARID	TR	Pp08	18216928	18222932
PB.14862.5	ARID	TR	Pp08	18217042	18222998
PB.14904.1	MYB-related	TF	Pp08	18497494	18500635
PB.1497.1	GARP-G2-like	TF	Pp01	28125004	28126821
PB.1501.1	MYB-related	TF	Pp01	28157224	28159615
PB.1502.2	MADS-M-type	TF	Pp01	28178333	28182756
PB.1502.3	MADS-M-type	TF	Pp01	28178405	28182741
PB.15053.1	AUX/IAA	TR	Pp08	19777472	19780552
PB.15053.3	AUX/IAA	TR	Pp08	19777607	19780552
PB.15053.4	AUX/IAA	TR	Pp08	19777636	19780317
PB.15064.3	GARP-G2-like	TF	Pp08	19838554	19843690
PB.15064.4	GARP-G2-like	TF	Pp08	19838585	19843711
PB.15064.5	GARP-G2-like	TF	Pp08	19838585	19843695
PB.15064.6	GARP-G2-like	TF	Pp08	19838585	19843695
PB.15064.7	GARP-G2-like	TF	Pp08	19838587	19843711
PB.15064.8	GARP-G2-like	TF	Pp08	19838620	19843561
PB.15064.9	GARP-G2-like	TF	Pp08	19838622	19843711
PB.15089.1	SNF2	TR	Pp08	20076297	20082062
PB.1509.2	NAC	TF	Pp01	28214793	28215711
PB.15095.2	Jumonji	TR	Pp08	20120950	20125751
PB.15106.1	MYB-related	TF	Pp08	20202775	20204413
PB.15126.1	bHLH	TF	Pp08	20469455	20471768
PB.15126.2	bHLH	TF	Pp08	20469562	20471759
PB.15151.2	AUX/IAA	TR	Pp08	20653674	20654881
PB.15155.1	bZIP	TF	Pp08	20667789	20670421
PB.15155.3	bZIP	TF	Pp08	20667792	20670401
PB.15156.3	GNAT	TR	Pp08	20670654	20675458
PB.1516.2	SET	TR	Pp01	28314779	28317281
PB.15170.2	HSF	TF	Pp08	20813673	20817604
PB.15170.3	HSF	TF	Pp08	20813674	20817263
PB.15170.4	HSF	TF	Pp08	20813676	20817531
PB.15170.5	HSF	TF	Pp08	20813792	20817604
PB.15210.2	TRAF	TR	Pp08	21103877	21109089
PB.15221.1	bHLH	TF	Pp08	21178183	21184630
PB.15221.4	bHLH	TF	Pp08	21178292	21184162
PB.15285.2	B3-ARF	TF	Pp08	21641306	21647442
PB.15285.5	B3-ARF	TF	Pp08	21641332	21647492
PB.15285.6	B3	TF	Pp08	21641486	21647946
PB.15285.7	B3-ARF	TF	Pp08	21643500	21647443
PB.15289.2	TUB	TF	Pp08	21670743	21673352
PB.15289.4	TUB	TF	Pp08	21670906	21673765
PB.15289.5	TUB	TF	Pp08	21670906	21673759
PB.15289.6	TUB	TF	Pp08	21670908	21673749
PB.15289.7	TUB	TF	Pp08	21670929	21673765
PB.15289.8	TUB	TF	Pp08	21670984	21673765
PB.15299.2	C3H	TF	Pp08	21768987	21772597
PB.15306.3	HB-other	TF	Pp08	21823750	21831313
PB.15379.2	SET	TR	Pp08	22270008	22276947
PB.15379.3	SET	TR	Pp08	22270008	22276951
PB.15379.4	CPP	TF	Pp08	22270012	22276951
PB.15379.6	SET	TR	Pp08	22270018	22276955
PB.1552.2	WRKY	TF	Pp01	28556704	28559359
PB.159.2	AUX/IAA	TR	Pp01	1919286	1920709
PB.159.3	AUX/IAA	TR	Pp01	1919286	1920711
PB.1593.3	SBP	TF	Pp01	28899843	28904483
PB.160.2	AUX/IAA	TR	Pp01	1933900	1936084
PB.1623.4	bHLH	TF	Pp01	29326038	29329250
PB.1660.1	NAC	TF	Pp01	29886526	29889937
PB.1668.1	C2H2	TF	Pp01	29933521	29936190
PB.1689.1	AP2/ERF-ERF	TF	Pp01	30162008	30164226
PB.169.1	bHLH	TF	Pp01	2170013	2172007
PB.1693.3	Others	TR	Pp01	30218239	30220012
PB.1693.4	Others	TR	Pp01	30218245	30220252
PB.1803.2	GRAS	TF	Pp01	31282032	31284575
PB.1819.2	Others	TR	Pp01	31407681	31411066
PB.1819.3	Tify	TF	Pp01	31407760	31411069
PB.1819.4	Tify	TF	Pp01	31407774	31411108
PB.184.4	Others	TR	Pp01	2385399	2389137
PB.1840.2	GARP-ARR-B	TF	Pp01	31601213	31605666
PB.1857.1	Others	TR	Pp01	31737432	31741565
PB.1858.3	C2H2	TF	Pp01	31753316	31756576
PB.1870.1	BBR-BPC	TF	Pp01	31877988	31879761
PB.1870.4	BBR-BPC	TF	Pp01	31878143	31879755
PB.1889.3	C2H2	TF	Pp01	32046359	32051604
PB.1892.3	SNF2	TR	Pp01	32068318	32073236
PB.1892.4	SNF2	TR	Pp01	32068383	32073252
PB.1960.3	Rcd1-like	TR	Pp01	32553009	32557846
PB.1960.4	Rcd1-like	TR	Pp01	32553009	32557740
PB.1960.6	Rcd1-like	TR	Pp01	32553014	32557778
PB.1966.1	MYB	TF	Pp01	32592330	32596985
PB.1966.3	MYB	TF	Pp01	32592344	32597825
PB.1966.4	MYB	TF	Pp01	32592584	32597465
PB.1973.1	SNF2	TR	Pp01	32639487	32648858
PB.1973.3	SNF2	TR	Pp01	32639498	32648960
PB.199.2	bHLH	TF	Pp01	2595579	2598184
PB.2000.1	TRAF	TR	Pp01	32890355	32896381
PB.2000.10	TRAF	TR	Pp01	32891205	32896270
PB.2000.12	TRAF	TR	Pp01	32891205	32896381
PB.2000.16	TRAF	TR	Pp01	32891220	32896381
PB.2000.17	TRAF	TR	Pp01	32891242	32896375
PB.2000.5	TRAF	TR	Pp01	32890580	32896277
PB.2108.2	B3-ARF	TF	Pp01	33696707	33702422
PB.2112.1	C3H	TF	Pp01	33715906	33720984
PB.2112.4	C3H	TF	Pp01	33716077	33720924
PB.2133.1	MADS-MIKC	TF	Pp01	33846796	33849530
PB.2178.1	TUB	TF	Pp01	34169678	34172495
PB.2178.3	TUB	TF	Pp01	34169683	34172466
PB.2178.5	TUB	TF	Pp01	34169687	34172495
PB.2221.2	NAC	TF	Pp01	34423561	34426746
PB.2221.3	NAC	TF	Pp01	34423728	34426725
PB.2227.2	Others	TR	Pp01	34485064	34490090
PB.2227.7	Others	TR	Pp01	34485178	34489709
PB.2244.2	B3	TF	Pp01	34708012	34711735
PB.2245.1	B3	TF	Pp01	34712849	34715602
PB.2245.2	B3	TF	Pp01	34712905	34715606
PB.2263.2	GARP-ARR-B	TF	Pp01	34875018	34879493
PB.2263.3	GARP-ARR-B	TF	Pp01	34875183	34878991
PB.2320.2	DBB	TF	Pp01	35275847	35277215
PB.2320.3	C2C2-CO-like	TF	Pp01	35275852	35277224
PB.2363.4	Alfin-like	TF	Pp01	35708025	35711291
PB.2363.5	Alfin-like	TF	Pp01	35708025	35711216
PB.2393.4	C2H2	TF	Pp01	35889350	35892263
PB.2414.1	HB-BELL	TF	Pp01	36032149	36036941
PB.2414.2	HB-BELL	TF	Pp01	36032732	36036905
PB.2437.2	HB-other	TF	Pp01	36176935	36180726
PB.2446.3	bHLH	TF	Pp01	36270151	36273787
PB.2511.3	MYB	TF	Pp01	36870809	36872503
PB.2511.6	MYB	TF	Pp01	36871252	36872502
PB.2537.1	bHLH	TF	Pp01	37040693	37043518
PB.2545.5	bZIP	TF	Pp01	37143707	37147747
PB.2639.2	CPP	TF	Pp01	37992227	37992764
PB.2752.3	LUG	TR	Pp01	38989152	38996825
PB.2752.7	LUG	TR	Pp01	38989169	38996923
PB.2776.1	CPP	TF	Pp01	39354941	39360370
PB.2785.1	HB-other	TF	Pp01	40034568	40036700
PB.2832.3	HB-KNOX	TF	Pp01	40478456	40482081
PB.2844.2	TRAF	TR	Pp01	40636094	40637940
PB.2852.1	SET	TR	Pp01	40729934	40741781
PB.2852.2	SET	TR	Pp01	40730037	40739828
PB.2877.1	NAC	TF	Pp01	40980064	40981901
PB.2892.1	TRAF	TR	Pp01	41104646	41106926
PB.2915.2	FAR1	TF	Pp01	41359546	41363559
PB.2915.4	FAR1	TF	Pp01	41359546	41363503
PB.2915.5	FAR1	TF	Pp01	41359546	41363408
PB.2915.6	FAR1	TF	Pp01	41359547	41363562
PB.2915.7	FAR1	TF	Pp01	41359547	41363540
PB.2915.8	FAR1	TF	Pp01	41359708	41363505
PB.2949.2	SET	TR	Pp01	41647603	41652071
PB.2964.5	PHD	TR	Pp01	41798775	41809106
PB.3.5	C3H	TF	Pp01	90030	100552
PB.300.4	PHD	TR	Pp01	4015988	4019193
PB.3058.2	Jumonji	TR	Pp01	42752695	42762029
PB.3072.2	HB-HD-ZIP	TF	Pp01	42838801	42840413
PB.3081.2	bHLH	TF	Pp01	42988243	42990360
PB.3096.1	zf-HD	TF	Pp01	43153705	43154908
PB.3122.1	MADS-MIKC	TF	Pp01	43444353	43454152
PB.3172.1	AUX/IAA	TR	Pp01	44179536	44185560
PB.3172.10	AUX/IAA	TR	Pp01	44180451	44185391
PB.3172.11	AUX/IAA	TR	Pp01	44180540	44185424
PB.3172.2	AUX/IAA	TR	Pp01	44179623	44185558
PB.3172.3	AUX/IAA	TR	Pp01	44179623	44185426
PB.3172.4	AUX/IAA	TR	Pp01	44179647	44185244
PB.3172.5	AUX/IAA	TR	Pp01	44179671	44185439
PB.3172.6	AUX/IAA	TR	Pp01	44179674	44185409
PB.3172.7	AUX/IAA	TR	Pp01	44179674	44185274
PB.3172.8	AUX/IAA	TR	Pp01	44179717	44185341
PB.3172.9	AUX/IAA	TR	Pp01	44180268	44185418
PB.3208.100	Others	TR	Pp01	45414720	45422364
PB.3208.103	Others	TR	Pp01	45414728	45422543
PB.3208.109	Others	TR	Pp01	45414778	45422538
PB.3208.111	Others	TR	Pp01	45414833	45422501
PB.3208.25	MADS-MIKC	TF	Pp01	44924934	44931159
PB.3208.26	MADS-MIKC	TF	Pp01	44926325	44931159
PB.3208.48	C2H2	TF	Pp01	45106137	45108854
PB.3208.49	C2H2	TF	Pp01	45106137	45108767
PB.3208.52	C2H2	TF	Pp01	45106138	45108797
PB.3208.54	C2H2	TF	Pp01	45106154	45108774
PB.3208.55	C2H2	TF	Pp01	45106154	45108775
PB.3265.2	TUB	TF	Pp01	45851666	45856989
PB.3265.3	TUB	TF	Pp01	45851863	45857002
PB.331.3	B3-ARF	TF	Pp01	4658147	4665760
PB.331.5	B3-ARF	TF	Pp01	4658239	4665758
PB.331.6	AUX/IAA	TR	Pp01	4658261	4665758
PB.3343.2	C2H2	TF	Pp01	46920630	46926122
PB.3343.3	C2H2	TF	Pp01	46920630	46926078
PB.3391.1	SWI/SNF-BAF60b	TR	Pp01	47330318	47341921
PB.3393.2	FAR1	TF	Pp01	47345128	47350368
PB.3397.4	BSD	TF	Pp01	47384754	47392547
PB.3406.2	C3H	TF	Pp01	47485621	47491831
PB.3423.4	Alfin-like	TF	Pp01	47643650	47648612
PB.3478.2	bHLH	TF	Pp02	802511	805924
PB.3478.6	bHLH	TF	Pp02	802678	805767
PB.3498.8	C3H	TF	Pp02	1031809	1038949
PB.3498.9	C3H	TF	Pp02	1031828	1038942
PB.35.3	LUG	TR	Pp01	491876	501059
PB.359.1	TCP	TF	Pp01	5000153	5002329
PB.3613.1	SNF2	TR	Pp02	3715732	3722390
PB.3622.1	mTERF	TR	Pp02	3949675	3951515
PB.3623.1	mTERF	TR	Pp02	3970619	3972376
PB.3626.2	mTERF	TR	Pp02	4010242	4012094
PB.3639.2	mTERF	TR	Pp02	4361513	4364499
PB.3639.5	mTERF	TR	Pp02	4363041	4364500
PB.3641.1	mTERF	TR	Pp02	4418125	4420418
PB.3646.2	mTERF	TR	Pp02	4523862	4526184
PB.3646.3	mTERF	TR	Pp02	4523862	4527093
PB.3646.4	mTERF	TR	Pp02	4523947	4527027
PB.3648.2	bZIP	TF	Pp02	4536592	4550259
PB.3656.1	RB	TR	Pp02	4710477	4718056
PB.3676.1	NF-YC	TF	Pp02	5481436	5486521
PB.3676.3	NF-YC	TF	Pp02	5481560	5486906
PB.3686.1	mTERF	TR	Pp02	5663049	5666263
PB.3691.2	MYB	TF	Pp02	5777164	5782508
PB.3709.1	SET	TR	Pp02	6487604	6490537
PB.3716.2	bZIP	TF	Pp02	6773332	6777626
PB.3721.4	EIL	TF	Pp02	7259777	7263515
PB.3722.3	EIL	TF	Pp02	7293650	7297304
PB.3722.5	EIL	TF	Pp02	7293654	7297375
PB.3725.1	SET	TR	Pp02	7322401	7327666
PB.3726.4	FAR1	TF	Pp02	7328529	7335007
PB.3726.5	FAR1	TF	Pp02	7328535	7334969
PB.3735.1	mTERF	TR	Pp02	7658778	7663127
PB.3735.2	mTERF	TR	Pp02	7658834	7663152
PB.3739.3	C2H2	TF	Pp02	7758629	7763276
PB.377.2	bHLH	TF	Pp01	5332086	5336098
PB.384.1	PHD	TR	Pp01	5395843	5406909
PB.384.2	PHD	TR	Pp01	5395872	5406927
PB.385.2	HB-other	TF	Pp01	5408054	5414099
PB.385.4	PHD	TR	Pp01	5408859	5414199
PB.3878.2	NAC	TF	Pp02	14426702	14432680
PB.3914.1	B3	TF	Pp02	15607040	15612814
PB.4080.1	C2C2-GATA	TF	Pp02	19312767	19314221
PB.4086.3	bHLH	TF	Pp02	19385661	19388193
PB.4086.4	bHLH	TF	Pp02	19385693	19389070
PB.4086.5	bHLH	TF	Pp02	19385693	19387427
PB.4097.1	GRAS	TF	Pp02	19548739	19551978
PB.4097.4	GRAS	TF	Pp02	19548853	19551988
PB.4097.6	GRAS	TF	Pp02	19549001	19551982
PB.4097.7	GRAS	TF	Pp02	19550025	19551976
PB.4141.1	GRF	TF	Pp02	20400170	20406562
PB.4141.2	GRF	TF	Pp02	20400174	20406562
PB.4141.4	GRF	TF	Pp02	20403222	20406282
PB.4162.3	MADS-MIKC	TF	Pp02	20600832	20606938
PB.4180.2	C3H	TF	Pp02	20759897	20762709
PB.4182.3	SET	TR	Pp02	20772445	20779640
PB.4235.1	MYB-related	TF	Pp02	21408698	21411430
PB.4235.2	MYB-related	TF	Pp02	21408754	21411586
PB.4251.1	BES1	TF	Pp02	21718360	21724539
PB.4251.3	BES1	TF	Pp02	21718451	21724520
PB.4294.2	MYB-related	TF	Pp02	22157182	22161664
PB.43.2	GARP-G2-like	TF	Pp01	586437	590961
PB.4345.2	WRKY	TF	Pp02	22636105	22638536
PB.4377.1	bHLH	TF	Pp02	22938575	22941333
PB.4392.2	C2C2-Dof	TF	Pp02	23145857	23147819
PB.4409.2	HB-HD-ZIP	TF	Pp02	23259153	23260559
PB.4433.2	Pseudo ARR-B	TR	Pp02	23596327	23600936
PB.4433.4	Others	TR	Pp02	23596468	23600933
PB.4443.1	MYB-related	TF	Pp02	23726840	23731518
PB.4443.4	MYB-related	TF	Pp02	23728337	23731518
PB.4443.6	MYB-related	TF	Pp02	23728549	23731516
PB.4444.1	MYB-related	TF	Pp02	23735460	23742682
PB.4444.10	MYB-related	TF	Pp02	23735635	23742601
PB.4444.11	MYB-related	TF	Pp02	23735635	23742641
PB.4444.12	MYB-related	TF	Pp02	23736325	23742558
PB.4444.3	MYB-related	TF	Pp02	23735500	23742623
PB.4444.4	MYB-related	TF	Pp02	23735517	23742671
PB.4444.5	MYB-related	TF	Pp02	23735554	23742671
PB.4444.7	MYB-related	TF	Pp02	23735583	23742598
PB.4451.1	NAC	TF	Pp02	23817006	23820390
PB.4451.4	NAC	TF	Pp02	23817059	23820387
PB.4452.1	NAC	TF	Pp02	23823081	23826710
PB.4453.2	NAC	TF	Pp02	23831531	23834070
PB.4453.3	NAC	TF	Pp02	23831532	23834065
PB.4454.1	NAC	TF	Pp02	23841613	23845667
PB.4455.1	NAC	TF	Pp02	23847156	23850455
PB.4455.2	NAC	TF	Pp02	23848202	23850667
PB.4456.1	NAC	TF	Pp02	23864663	23867993
PB.4457.1	NAC	TF	Pp02	23868305	23871112
PB.4457.2	NAC	TF	Pp02	23868310	23871109
PB.4457.4	NAC	TF	Pp02	23868320	23871109
PB.4457.5	NAC	TF	Pp02	23868329	23871109
PB.4458.1	NAC	TF	Pp02	23883007	23884079
PB.4459.1	NAC	TF	Pp02	23886454	23888933
PB.4460.1	NAC	TF	Pp02	23891046	23893846
PB.4460.2	NAC	TF	Pp02	23891091	23893815
PB.4460.4	NAC	TF	Pp02	23891130	23893846
PB.4461.1	NAC	TF	Pp02	23895323	23898354
PB.4472.1	NAC	TF	Pp02	23990730	23992212
PB.4497.1	SWI/SNF-SWI3	TR	Pp02	24172327	24176699
PB.4522.2	C2H2	TF	Pp02	24376744	24379557
PB.4531.2	B3-ARF	TF	Pp02	24477420	24480688
PB.4534.2	GNAT	TR	Pp02	24495577	24498292
PB.4690.2	TRAF	TR	Pp02	26004930	26009549
PB.4750.1	HMG	TR	Pp02	26444001	26446929
PB.4759.1	NF-X1	TF	Pp02	26515400	26520509
PB.4763.1	Alfin-like	TF	Pp02	26550597	26553648
PB.4765.5	C3H	TF	Pp02	26566684	26569719
PB.4777.1	Trihelix	TF	Pp02	26670998	26673685
PB.4777.2	Trihelix	TF	Pp02	26671642	26673685
PB.4777.3	Trihelix	TF	Pp02	26672319	26673687
PB.4850.2	WRKY	TF	Pp02	27216529	27218763
PB.4850.3	WRKY	TF	Pp02	27216670	27218835
PB.4854.3	SNF2	TR	Pp02	27236651	27238655
PB.4872.4	SET	TR	Pp02	27357340	27363080
PB.4934.1	MYB-related	TF	Pp02	27951127	27952896
PB.4972.1	MADS-M-type	TF	Pp02	28315121	28320869
PB.4972.2	MADS-M-type	TF	Pp02	28315221	28320819
PB.4979.2	C3H	TF	Pp02	28367402	28371522
PB.4979.4	C3H	TF	Pp02	28367490	28371522
PB.4987.1	AP2/ERF-ERF	TF	Pp02	28405769	28406785
PB.4994.1	FAR1	TF	Pp02	28476331	28484558
PB.5000.1	HSF	TF	Pp02	28530094	28531627
PB.5035.1	C2H2	TF	Pp02	28756553	28761420
PB.5035.2	C2H2	TF	Pp02	28756566	28761315
PB.5046.1	GRAS	TF	Pp02	28849952	28852266
PB.5046.2	GRAS	TF	Pp02	28849960	28852419
PB.5046.3	GRAS	TF	Pp02	28849963	28852676
PB.5046.4	GRAS	TF	Pp02	28850063	28852799
PB.5046.5	GRAS	TF	Pp02	28850063	28852545
PB.5117.1	Jumonji	TR	Pp02	29346015	29352991
PB.5129.1	PHD	TR	Pp02	29414617	29421950
PB.516.2	SET	TR	Pp01	8078563	8085909
PB.5170.2	HB-HD-ZIP	TF	Pp02	29687973	29688916
PB.5198.3	NAC	TF	Pp02	29853484	29856775
PB.5198.4	NAC	TF	Pp02	29853485	29855968
PB.5198.7	NAC	TF	Pp02	29853910	29856775
PB.5243.2	E2F-DP	TF	Pp02	30086261	30090078
PB.5255.3	GNAT	TR	Pp02	30160537	30163752
PB.527.1	SNF2	TR	Pp01	8248560	8256203
PB.5296.1	WRKY	TF	Pp03	162574	165697
PB.5356.1	B3-ARF	TF	Pp03	729253	741252
PB.5356.3	B3-ARF	TF	Pp03	729376	741227
PB.5356.5	B3-ARF	TF	Pp03	729378	741227
PB.5356.6	AUX/IAA	TR	Pp03	729381	741227
PB.5356.7	B3-ARF	TF	Pp03	729391	741199
PB.5369.3	MYB-related	TF	Pp03	1061585	1064493
PB.5441.4	GARP-G2-like	TF	Pp03	2032901	2037041
PB.5471.2	ARID	TR	Pp03	2375171	2382183
PB.5471.3	ARID	TR	Pp03	2375306	2382181
PB.5474.3	AP2/ERF-ERF	TF	Pp03	2404769	2407706
PB.5474.7	AP2/ERF-ERF	TF	Pp03	2404773	2407696
PB.549.1	SBP	TF	Pp01	8541935	8549341
PB.550.2	SBP	TF	Pp01	8549807	8556442
PB.550.3	SBP	TF	Pp01	8549901	8556454
PB.5502.2	Tify	TF	Pp03	2732443	2733805
PB.5534.4	MYB-related	TF	Pp03	3053182	3059280
PB.5534.6	MYB-related	TF	Pp03	3053187	3059156
PB.5534.7	MYB-related	TF	Pp03	3053193	3059241
PB.5534.8	MYB-related	TF	Pp03	3053205	3059532
PB.5539.2	NF-YA	TF	Pp03	3122449	3127341
PB.5540.3	PHD	TR	Pp03	3128545	3132494
PB.5549.1	MYB-related	TF	Pp03	3259627	3262629
PB.5553.1	mTERF	TR	Pp03	3282863	3284536
PB.5557.1	GeBP	TF	Pp03	3325339	3326917
PB.5557.2	GeBP	TF	Pp03	3325465	3326814
PB.5611.1	bHLH	TF	Pp03	3823501	3825948
PB.5630.2	AUX/IAA	TR	Pp03	4137389	4140749
PB.5630.4	AUX/IAA	TR	Pp03	4137512	4140979
PB.5642.2	HB-other	TF	Pp03	4336149	4337765
PB.5642.4	HB-other	TF	Pp03	4336247	4340554
PB.5642.6	HB-other	TF	Pp03	4336248	4341188
PB.5642.7	HB-other	TF	Pp03	4336263	4341284
PB.5645.3	HB-HD-ZIP	TF	Pp03	4364279	4371175
PB.565.2	CAMTA	TF	Pp01	8686327	8694249
PB.5664.3	AUX/IAA	TR	Pp03	4585282	4588196
PB.5677.5	HB-HD-ZIP	TF	Pp03	4843915	4848177
PB.5677.6	HB-HD-ZIP	TF	Pp03	4843992	4848255
PB.5677.7	HB-HD-ZIP	TF	Pp03	4844270	4848096
PB.5724.3	AUX/IAA	TR	Pp03	5480884	5484114
PB.5724.4	AUX/IAA	TR	Pp03	5480886	5484222
PB.5725.1	AUX/IAA	TR	Pp03	5491101	5492753
PB.5725.2	AUX/IAA	TR	Pp03	5491101	5492652
PB.5725.3	AUX/IAA	TR	Pp03	5491101	5493483
PB.5725.4	AUX/IAA	TR	Pp03	5491101	5492709
PB.5797.1	FAR1	TF	Pp03	6709400	6712074
PB.5797.2	FAR1	TF	Pp03	6709401	6712137
PB.5797.5	FAR1	TF	Pp03	6709595	6712137
PB.5797.6	FAR1	TF	Pp03	6709603	6712075
PB.5896.3	HSF	TF	Pp03	8727949	8731907
PB.5902.1	MADS-M-type	TF	Pp03	9277223	9283013
PB.5902.2	MADS-M-type	TF	Pp03	9277348	9282539
PB.5902.4	MADS-M-type	TF	Pp03	9277351	9282539
PB.5902.5	MADS-M-type	TF	Pp03	9277358	9282727
PB.5902.6	MADS-M-type	TF	Pp03	9277358	9282435
PB.5902.7	MADS-M-type	TF	Pp03	9277363	9280796
PB.5902.8	MADS-M-type	TF	Pp03	9277404	9282194
PB.5928.2	MBF1	TR	Pp03	9886623	9889420
PB.5928.4	MBF1	TR	Pp03	9886717	9888698
PB.5961.2	VOZ	TF	Pp03	11877588	11881954
PB.6065.1	HMG	TR	Pp03	16596292	16601729
PB.6065.3	HMG	TR	Pp03	16596390	16601722
PB.6120.1	MYB-related	TF	Pp03	18220514	18222739
PB.6122.3	GARP-G2-like	TF	Pp03	18288916	18295519
PB.6166.2	MADS-MIKC	TF	Pp03	18936508	18943021
PB.6253.5	FAR1	TF	Pp03	20052018	20056862
PB.6254.2	FAR1	TF	Pp03	20057714	20063816
PB.6295.1	Others	TR	Pp03	20605490	20610036
PB.6295.2	C2C2-CO-like	TF	Pp03	20605558	20609858
PB.6295.3	C2C2-CO-like	TF	Pp03	20605558	20610053
PB.6295.5	C2C2-CO-like	TF	Pp03	20605558	20610053
PB.6295.6	C2C2-CO-like	TF	Pp03	20605582	20609820
PB.6305.6	SET	TR	Pp03	20699279	20703253
PB.6318.1	MYB-related	TF	Pp03	20834631	20838715
PB.6318.2	MYB-related	TF	Pp03	20834662	20839133
PB.6318.4	MYB-related	TF	Pp03	20834713	20838715
PB.6323.4	C3H	TF	Pp03	20928786	20933745
PB.6333.3	Others	TR	Pp03	21007224	21013477
PB.6334.3	GRAS	TF	Pp03	21021996	21025251
PB.6334.4	GRAS	TF	Pp03	21021998	21025211
PB.6334.5	GRAS	TF	Pp03	21022003	21025358
PB.6335.5	WRKY	TF	Pp03	21025407	21029275
PB.6335.8	WRKY	TF	Pp03	21027281	21029376
PB.6446.1	C3H	TF	Pp03	22096610	22101859
PB.6446.3	C3H	TF	Pp03	22096667	22102168
PB.6448.1	SET	TR	Pp03	22127901	22132331
PB.6448.4	SET	TR	Pp03	22127956	22132194
PB.6459.2	SET	TR	Pp03	22286619	22292418
PB.6464.2	AP2/ERF-ERF	TF	Pp03	22338732	22340574
PB.6464.3	AP2/ERF-ERF	TF	Pp03	22338802	22340596
PB.6503.2	ULT	TF	Pp03	22923069	22926592
PB.6573.2	Others	TR	Pp03	23686174	23688457
PB.6592.2	bHLH	TF	Pp03	23852443	23856421
PB.6592.3	bHLH	TF	Pp03	23852491	23856406
PB.6601.2	MADS-MIKC	TF	Pp03	23961891	23966439
PB.662.1	FAR1	TF	Pp01	9905934	9910131
PB.662.3	FAR1	TF	Pp01	9906017	9910188
PB.6625.2	TCP	TF	Pp03	24210307	24212698
PB.664.3	C2C2-GATA	TF	Pp01	9922786	9924152
PB.6676.1	WRKY	TF	Pp03	24762594	24766286
PB.6676.2	WRKY	TF	Pp03	24762655	24766286
PB.6676.3	WRKY	TF	Pp03	24762668	24766286
PB.6676.5	WRKY	TF	Pp03	24762691	24766262
PB.6707.2	zf-HD	TF	Pp03	25025506	25027177
PB.6707.5	zf-HD	TF	Pp03	25025700	25027177
PB.6707.6	zf-HD	TF	Pp03	25026132	25027177
PB.6707.7	zf-HD	TF	Pp03	25026246	25027177
PB.6721.2	bHLH	TF	Pp03	25125681	25127159
PB.6728.2	HMG	TR	Pp03	25224919	25230331
PB.683.10	Others	TR	Pp01	9945883	9950085
PB.683.14	Others	TR	Pp01	9946048	9950071
PB.6907.2	FAR1	TF	Pp03	26429024	26432359
PB.6909.1	FAR1	TF	Pp03	26434439	26438527
PB.6909.2	FAR1	TF	Pp03	26434461	26438024
PB.6909.4	FAR1	TF	Pp03	26434469	26438305
PB.6941.2	mTERF	TR	Pp03	26647354	26650364
PB.6961.3	SWI/SNF-BAF60b	TR	Pp03	26753632	26756612
PB.6976.2	SBP	TF	Pp03	26849610	26852135
PB.6976.5	SBP	TF	Pp03	26849741	26851851
PB.7016.2	SET	TR	Pp03	27129652	27136597
PB.7043.2	GARP-G2-like	TF	Pp04	99802	103720
PB.7043.4	GARP-G2-like	TF	Pp04	99803	103749
PB.7044.2	GARP-G2-like	TF	Pp04	107016	109841
PB.7083.2	MYB-related	TF	Pp04	354943	360439
PB.7083.3	MYB-related	TF	Pp04	355529	360039
PB.7090.1	GRAS	TF	Pp04	394525	398600
PB.7090.2	GRAS	TF	Pp04	394533	398493
PB.7090.3	GRAS	TF	Pp04	394537	401477
PB.7106.1	SWI/SNF-BAF60b	TR	Pp04	500398	503483
PB.7143.2	Jumonji	TR	Pp04	774833	779656
PB.7148.3	WRKY	TF	Pp04	822078	825159
PB.7148.4	WRKY	TF	Pp04	822086	825160
PB.7176.2	MYB-related	TF	Pp04	1060025	1061810
PB.7210.2	bHLH	TF	Pp04	1352663	1355319
PB.7214.1	GeBP	TF	Pp04	1374562	1375926
PB.722.2	C3H	TF	Pp01	10934468	10938591
PB.722.4	C3H	TF	Pp01	10934567	10938591
PB.722.5	C3H	TF	Pp01	10934573	10936961
PB.722.7	C3H	TF	Pp01	10935091	10938591
PB.7249.1	Jumonji	TR	Pp04	1622375	1628253
PB.7289.3	SNF2	TR	Pp04	1905970	1914432
PB.7289.4	SNF2	TR	Pp04	1905970	1914349
PB.7289.5	SNF2	TR	Pp04	1906121	1912603
PB.7302.1	C2C2-Dof	TF	Pp04	2001479	2003613
PB.7302.2	C2C2-Dof	TF	Pp04	2001589	2003613
PB.7302.3	C2C2-Dof	TF	Pp04	2001621	2004046
PB.7350.1	C2C2-Dof	TF	Pp04	2401939	2403994
PB.7356.2	C3H	TF	Pp04	2436982	2440623
PB.7364.1	C2H2	TF	Pp04	2475936	2479146
PB.7364.2	C2H2	TF	Pp04	2476026	2479083
PB.7364.3	C2H2	TF	Pp04	2476080	2479146
PB.7371.1	DDT	TR	Pp04	2530774	2541118
PB.7371.2	DDT	TR	Pp04	2530801	2540993
PB.7379.4	B3-ARF	TF	Pp04	2598685	2602761
PB.7379.5	B3-ARF	TF	Pp04	2598690	2603902
PB.7383.2	VOZ	TF	Pp04	2627128	2630102
PB.7425.3	Trihelix	TF	Pp04	2958930	2962378
PB.7425.4	Trihelix	TF	Pp04	2958945	2962387
PB.743.2	TUB	TF	Pp01	11202806	11205999
PB.743.5	TUB	TF	Pp01	11203646	11205999
PB.7461.3	HSF	TF	Pp04	3306817	3309153
PB.7514.2	HMG	TR	Pp04	3798413	3801543
PB.7551.2	TCP	TF	Pp04	4080710	4089453
PB.7565.3	B3	TF	Pp04	4217290	4223983
PB.757.1	SBP	TF	Pp01	11351911	11358808
PB.757.4	SBP	TF	Pp01	11351942	11358778
PB.757.5	SBP	TF	Pp01	11352001	11358810
PB.757.6	SBP	TF	Pp01	11352001	11359197
PB.7592.2	C3H	TF	Pp04	4447162	4448584
PB.7650.1	C2C2-LSD	TF	Pp04	5211160	5217605
PB.7651.1	Jumonji	TR	Pp04	5220790	5228235
PB.7672.3	LOB	TF	Pp04	5462318	5464989
PB.7672.4	LOB	TF	Pp04	5462332	5464995
PB.7681.1	mTERF	TR	Pp04	5611118	5613340
PB.7729.3	FAR1	TF	Pp04	6193358	6198330
PB.7745.4	C2H2	TF	Pp04	6350829	6355701
PB.7780.2	C3H	TF	Pp04	6769289	6775147
PB.7780.4	C3H	TF	Pp04	6769329	6775147
PB.7780.5	C3H	TF	Pp04	6769371	6775265
PB.7780.6	C3H	TF	Pp04	6769408	6775147
PB.7780.9	C3H	TF	Pp04	6769432	6775147
PB.7792.3	PHD	TR	Pp04	6906472	6924583
PB.782.1	FAR1	TF	Pp01	11642385	11645735
PB.782.2	FAR1	TF	Pp01	11642387	11646312
PB.782.3	FAR1	TF	Pp01	11642480	11645701
PB.782.4	FAR1	TF	Pp01	11642520	11645703
PB.7821.1	NF-YC	TF	Pp04	7318329	7321116
PB.7821.2	NF-YC	TF	Pp04	7318384	7320994
PB.7834.1	SNF2	TR	Pp04	7488364	7501372
PB.7865.1	TRAF	TR	Pp04	7858837	7868379
PB.7865.2	TRAF	TR	Pp04	7858837	7868379
PB.7865.3	TRAF	TR	Pp04	7858863	7868379
PB.7865.4	TRAF	TR	Pp04	7858885	7868379
PB.788.4	TRAF	TR	Pp01	11683713	11687042
PB.7969.2	TUB	TF	Pp04	9551876	9555254
PB.7969.3	TUB	TF	Pp04	9551900	9555223
PB.7969.4	TUB	TF	Pp04	9551924	9555388
PB.7989.3	PHD	TR	Pp04	9737235	9745880
PB.8009.1	TCP	TF	Pp04	10105766	10108828
PB.8013.2	bZIP	TF	Pp04	10187032	10189845
PB.8013.3	bZIP	TF	Pp04	10187032	10189843
PB.807.10	NF-YC	TF	Pp01	12042453	12045551
PB.807.11	NF-YC	TF	Pp01	12042504	12045560
PB.807.2	NF-YC	TF	Pp01	12042442	12045615
PB.807.3	NF-YC	TF	Pp01	12042442	12045581
PB.807.4	NF-YC	TF	Pp01	12042445	12045596
PB.807.5	NF-YC	TF	Pp01	12042445	12045489
PB.807.6	NF-YC	TF	Pp01	12042453	12045580
PB.807.8	NF-YC	TF	Pp01	12042453	12045467
PB.8092.3	NAC	TF	Pp04	11116854	11118487
PB.8093.2	NAC	TF	Pp04	11138525	11140618
PB.8093.6	NAC	TF	Pp04	11138570	11141778
PB.8093.9	NAC	TF	Pp04	11138571	11140636
PB.8111.1	B3	TF	Pp04	11300956	11316706
PB.8111.2	B3	TF	Pp04	11306232	11316707
PB.821.2	SNF2	TR	Pp01	12192957	12202684
PB.824.7	TRAF	TR	Pp01	12269347	12275453
PB.8274.3	AP2/ERF-ERF	TF	Pp04	13957493	13959788
PB.8312.1	SWI/SNF-BAF60b	TR	Pp04	14562829	14566552
PB.8312.2	SWI/SNF-BAF60b	TR	Pp04	14562868	14566372
PB.8312.3	SWI/SNF-BAF60b	TR	Pp04	14562890	14566551
PB.8312.4	SWI/SNF-BAF60b	TR	Pp04	14562892	14566551
PB.8333.5	GRAS	TF	Pp04	14976439	14979162
PB.8385.3	Trihelix	TF	Pp04	16213045	16215455
PB.8393.1	PHD	TR	Pp04	16354820	16362024
PB.8408.2	NF-YA	TF	Pp04	16709857	16714486
PB.8408.4	NF-YA	TF	Pp04	16709857	16714486
PB.8408.5	NF-YA	TF	Pp04	16709861	16714396
PB.8408.7	NF-YA	TF	Pp04	16709884	16714406
PB.8443.1	DDT	TR	Pp04	18172049	18182675
PB.8443.3	DDT	TR	Pp04	18172115	18182630
PB.8443.4	DDT	TR	Pp04	18174062	18182579
PB.8450.1	FAR1	TF	Pp04	18380038	18384261
PB.8450.2	FAR1	TF	Pp04	18380048	18384227
PB.8488.2	SRS	TF	Pp04	20095806	20098856
PB.8492.2	HB-other	TF	Pp04	20168483	20179830
PB.8539.1	SNF2	TR	Pp04	23022296	23041273
PB.8539.2	SNF2	TR	Pp04	23022296	23041117
PB.8539.3	SNF2	TR	Pp04	23024579	23039416
PB.8557.2	NAC	TF	Pp04	23605891	23606332
PB.8557.3	NAC	TF	Pp04	23605891	23607451
PB.8570.2	DDT	TR	Pp04	23910866	23918587
PB.8570.3	DDT	TR	Pp04	23910891	23918647
PB.8570.5	DDT	TR	Pp04	23910920	23918647
PB.8570.6	DDT	TR	Pp04	23910922	23917142
PB.8570.7	DDT	TR	Pp04	23910924	23918393
PB.8570.9	DDT	TR	Pp04	23910933	23918629
PB.8599.2	SET	TR	Pp04	25295923	25298635
PB.8605.10	PHD	TR	Pp04	25409682	25415018
PB.8605.12	PHD	TR	Pp04	25409699	25415119
PB.8605.13	PHD	TR	Pp04	25409699	25414998
PB.8605.4	PHD	TR	Pp04	25409650	25415090
PB.8605.7	PHD	TR	Pp04	25409670	25415097
PB.8605.8	PHD	TR	Pp04	25409670	25415192
PB.8605.9	PHD	TR	Pp04	25409682	25415018
PB.8653.10	ARID	TR	Pp05	563987	574610
PB.8653.3	ARID	TR	Pp05	563936	574620
PB.8653.4	ARID	TR	Pp05	563936	574615
PB.8653.5	ARID	TR	Pp05	563936	574604
PB.8653.6	ARID	TR	Pp05	563936	574659
PB.8653.7	ARID	TR	Pp05	563964	574614
PB.8653.9	ARID	TR	Pp05	563987	574628
PB.868.4	HSF	TF	Pp01	13409896	13411987
PB.8694.2	RWP-RK	TF	Pp05	1154696	1160758
PB.8705.2	BES1	TF	Pp05	1446935	1453578
PB.8784.1	IWS1	TR	Pp05	3037811	3046152
PB.8785.3	bZIP	TF	Pp05	3081669	3091219
PB.8785.4	bZIP	TF	Pp05	3081746	3091185
PB.8785.5	bZIP	TF	Pp05	3081763	3091219
PB.8824.3	C3H	TF	Pp05	3747320	3752282
PB.8857.3	C2C2-LSD	TF	Pp05	4387393	4389628
PB.8884.3	GARP-ARR-B	TF	Pp05	4893931	4899892
PB.8884.5	GARP-ARR-B	TF	Pp05	4894035	4900249
PB.8884.7	GARP-G2-like	TF	Pp05	4894075	4900249
PB.8954.2	C2C2-GATA	TF	Pp05	6293770	6300135
PB.8988.2	HB-HD-ZIP	TF	Pp05	7821853	7824034
PB.899.3	bHLH	TF	Pp01	14478737	14481556
PB.8992.3	MYB-related	TF	Pp05	7908688	7914449
PB.8992.5	MYB-related	TF	Pp05	7908822	7914512
PB.8996.1	MYB-related	TF	Pp05	7963394	7964731
PB.9035.1	GRAS	TF	Pp05	8700213	8703625
PB.9035.3	GRAS	TF	Pp05	8700353	8703581
PB.9076.1	MYB-related	TF	Pp05	9126117	9128017
PB.9218.2	ARID	TR	Pp05	11040187	11043934
PB.9229.4	HB-BELL	TF	Pp05	11131269	11135340
PB.923.1	PHD	TR	Pp01	15205669	15220506
PB.9234.3	MYB-related	TF	Pp05	11207032	11209502
PB.9292.2	HMG	TR	Pp05	11824303	11827198
PB.9362.2	TRAF	TR	Pp05	12414882	12417192
PB.9415.3	NAC	TF	Pp05	12859794	12863829
PB.9433.2	Trihelix	TF	Pp05	12968682	12973547
PB.9433.3	Trihelix	TF	Pp05	12968783	12973697
PB.9433.5	Trihelix	TF	Pp05	12968796	12973750
PB.9433.6	Trihelix	TF	Pp05	12968801	12973761
PB.9433.7	Trihelix	TF	Pp05	12969871	12973600
PB.9552.9	B3	TF	Pp05	13891415	13893532
PB.9556.1	mTERF	TR	Pp05	13923207	13925305
PB.9564.2	C2H2	TF	Pp05	13973367	13977160
PB.9564.3	C2H2	TF	Pp05	13973384	13976475
PB.9564.6	C2H2	TF	Pp05	13974082	13977233
PB.9570.3	C3H	TF	Pp05	14040091	14043799
PB.9570.4	C3H	TF	Pp05	14040111	14043782
PB.9570.8	C3H	TF	Pp05	14040471	14043766
PB.9570.9	C3H	TF	Pp05	14040471	14043561
PB.9571.4	C3H	TF	Pp05	14045414	14050246
PB.9572.1	C3H	TF	Pp05	14051419	14058611
PB.9572.3	C3H	TF	Pp05	14051465	14058571
PB.9572.5	C3H	TF	Pp05	14051502	14058418
PB.9573.1	C3H	TF	Pp05	14060141	14065943
PB.9573.2	C3H	TF	Pp05	14060153	14065868
PB.9573.3	C3H	TF	Pp05	14060310	14065844
PB.9574.1	C3H	TF	Pp05	14072720	14077713
PB.9574.2	C3H	TF	Pp05	14072741	14077722
PB.9574.3	C3H	TF	Pp05	14074314	14077715
PB.9575.3	C3H	TF	Pp05	14078274	14081416
PB.9740.2	DDT	TR	Pp05	15290786	15297372
PB.9740.3	DDT	TR	Pp05	15290801	15297372
PB.9740.6	DDT	TR	Pp05	15290894	15297285
PB.9813.1	Others	TR	Pp05	15974244	15978423
PB.9813.2	Others	TR	Pp05	15974290	15977932
PB.9813.3	Others	TR	Pp05	15974290	15977934
PB.9813.5	Others	TR	Pp05	15974352	15978104
PB.9814.1	Others	TR	Pp05	15982747	15988017
PB.9814.2	Pseudo ARR-B	TR	Pp05	15982841	15987911
PB.9814.3	Others	TR	Pp05	15982874	15987910
PB.9839.3	MYB-related	TF	Pp05	16215142	16218864
PB.9883.4	MADS-M-type	TF	Pp05	16629345	16632452
PB.9883.5	MADS-M-type	TF	Pp05	16629368	16632394
PB.9883.6	MADS-M-type	TF	Pp05	16629370	16632396
PB.9919.2	NF-YB	TF	Pp05	16902165	16905069
PB.9933.1	TCP	TF	Pp05	17024867	17026938
PB.9955.2	Others	TR	Pp05	17208891	17211096
Prupe.1G000600.1	C3H	TF	Pp01	89887	100651
Prupe.1G000600.2	C3H	TF	Pp01	89887	100651
Prupe.1G000600.3	C3H	TF	Pp01	89926	100588
Prupe.1G000600.4	C3H	TF	Pp01	89928	100588
Prupe.1G000600.5	C3H	TF	Pp01	89928	100588
Prupe.1G001700.1	AP2/ERF-ERF	TF	Pp01	213970	214521
Prupe.1G005300.1	mTERF	TR	Pp01	465016	467015
Prupe.1G005700.1	LUG	TR	Pp01	491736	501116
Prupe.1G005700.2	LUG	TR	Pp01	492377	500815
Prupe.1G005800.1	mTERF	TR	Pp01	501838	503037
Prupe.1G005800.2	mTERF	TR	Pp01	501744	503113
Prupe.1G005900.1	mTERF	TR	Pp01	512720	513907
Prupe.1G006000.1	mTERF	TR	Pp01	519183	520382
Prupe.1G006600.1	bHLH	TF	Pp01	558804	560976
Prupe.1G006600.2	bHLH	TF	Pp01	558639	560976
Prupe.1G006600.3	bHLH	TF	Pp01	558741	560976
Prupe.1G007000.1	GARP-G2-like	TF	Pp01	586207	591015
Prupe.1G008100.1	ARID	TR	Pp01	677363	683543
Prupe.1G008100.2	ARID	TR	Pp01	677363	683543
Prupe.1G008100.3	ARID	TR	Pp01	677363	683543
Prupe.1G008100.4	ARID	TR	Pp01	677363	683543
Prupe.1G008400.1	AP2/ERF-ERF	TF	Pp01	692542	694269
Prupe.1G013200.1	PHD	TR	Pp01	1003915	1012843
Prupe.1G013200.2	PHD	TR	Pp01	1004090	1012843
Prupe.1G014600.1	OFP	TF	Pp01	1074851	1075546
Prupe.1G016400.1	GNAT	TR	Pp01	1175477	1176427
Prupe.1G016500.1	GNAT	TR	Pp01	1176916	1177437
Prupe.1G016600.1	GNAT	TR	Pp01	1177720	1179272
Prupe.1G016700.1	GNAT	TR	Pp01	1180237	1180772
Prupe.1G019100.1	CPP	TF	Pp01	1328473	1333844
Prupe.1G019100.2	CPP	TF	Pp01	1328471	1333847
Prupe.1G020900.1	Tify	TF	Pp01	1463167	1469284
Prupe.1G020900.2	Tify	TF	Pp01	1463167	1469284
Prupe.1G020900.3	Tify	TF	Pp01	1463167	1469284
Prupe.1G020900.4	Tify	TF	Pp01	1463167	1469284
Prupe.1G020900.5	Tify	TF	Pp01	1463167	1467693
Prupe.1G020900.6	Tify	TF	Pp01	1464905	1469284
Prupe.1G020900.7	Tify	TF	Pp01	1464905	1469284
Prupe.1G021200.1	HSF	TF	Pp01	1478253	1480784
Prupe.1G027500.1	AUX/IAA	TR	Pp01	1919207	1920881
Prupe.1G027600.1	AUX/IAA	TR	Pp01	1933812	1936072
Prupe.1G030500.1	bHLH	TF	Pp01	2170019	2172394
Prupe.1G032200.1	MADS-M-type	TF	Pp01	2260818	2261840
Prupe.1G033400.1	LOB	TF	Pp01	2316907	2317203
Prupe.1G034100.1	C2H2	TF	Pp01	2368925	2370453
Prupe.1G034100.2	C2H2	TF	Pp01	2368925	2370496
Prupe.1G034200.1	C2H2	TF	Pp01	2375310	2375891
Prupe.1G034300.1	Others	TR	Pp01	2384607	2389123
Prupe.1G034800.1	SNF2	TR	Pp01	2436594	2443236
Prupe.1G035300.1	MED7	TR	Pp01	2465833	2468962
Prupe.1G037400.1	bHLH	TF	Pp01	2595576	2598209
Prupe.1G037700.1	AP2/ERF-ERF	TF	Pp01	2616755	2617527
Prupe.1G037800.1	AP2/ERF-ERF	TF	Pp01	2621431	2622231
Prupe.1G037900.1	AP2/ERF-ERF	TF	Pp01	2632301	2633915
Prupe.1G039200.1	MYB	TF	Pp01	2785268	2787702
Prupe.1G040800.1	C2H2	TF	Pp01	2929218	2929838
Prupe.1G047100.1	SET	TR	Pp01	3329386	3336805
Prupe.1G047100.2	SET	TR	Pp01	3329336	3336805
Prupe.1G047100.3	SET	TR	Pp01	3329370	3336805
Prupe.1G047100.4	SET	TR	Pp01	3329386	3336812
Prupe.1G047100.5	SET	TR	Pp01	3329386	3336812
Prupe.1G047400.1	Others	TR	Pp01	3347336	3350486
Prupe.1G047400.2	Others	TR	Pp01	3347336	3352396
Prupe.1G048600.1	MADS-M-type	TF	Pp01	3427285	3428419
Prupe.1G049200.1	AUX/IAA	TR	Pp01	3457675	3460523
Prupe.1G050800.1	SET	TR	Pp01	3558602	3565622
Prupe.1G050800.2	SET	TR	Pp01	3558565	3565660
Prupe.1G050800.3	SET	TR	Pp01	3558614	3565403
Prupe.1G050800.4	SET	TR	Pp01	3562588	3565622
Prupe.1G051100.1	MYB	TF	Pp01	3592314	3593660
Prupe.1G051300.1	MYB	TF	Pp01	3601947	3603229
Prupe.1G063700.1	NAC	TF	Pp01	4536126	4536752
Prupe.1G065300.1	B3-ARF	TF	Pp01	4658133	4665858
Prupe.1G065300.2	B3-ARF	TF	Pp01	4658133	4665858
Prupe.1G068400.1	HB-HD-ZIP	TF	Pp01	4877218	4878650
Prupe.1G070500.1	TCP	TF	Pp01	4998154	5002286
Prupe.1G070500.2	TCP	TF	Pp01	4998154	5002319
Prupe.1G070500.3	TCP	TF	Pp01	4998154	5002310
Prupe.1G071400.1	WRKY	TF	Pp01	5055585	5057067
Prupe.1G074100.1	FAR1	TF	Pp01	5307612	5308849
Prupe.1G074400.1	bHLH	TF	Pp01	5331904	5336485
Prupe.1G074400.2	bHLH	TF	Pp01	5331904	5333675
Prupe.1G074900.1	Others	TR	Pp01	5376716	5381669
Prupe.1G074900.2	Others	TR	Pp01	5376716	5381669
Prupe.1G075400.1	PHD	TR	Pp01	5401468	5407085
Prupe.1G075500.1	HB-PHD	TF	Pp01	5407949	5414252
Prupe.1G075500.2	PHD	TR	Pp01	5407949	5414252
Prupe.1G075500.4	HB-PHD	TF	Pp01	5407949	5414252
Prupe.1G075500.5	HB-other	TF	Pp01	5407949	5414252
Prupe.1G084800.1	AP2/ERF-ERF	TF	Pp01	6308151	6309086
Prupe.1G084900.1	AP2/ERF-AP2	TF	Pp01	6317463	6321243
Prupe.1G085900.1	AUX/IAA	TR	Pp01	6379476	6380776
Prupe.1G086300.1	SET	TR	Pp01	6415891	6423749
Prupe.1G087700.1	MADS-M-type	TF	Pp01	6532178	6532777
Prupe.1G088000.1	C2H2	TF	Pp01	6561504	6562675
Prupe.1G088700.1	NAC	TF	Pp01	6635984	6637464
Prupe.1G089700.1	MYB	TF	Pp01	6721667	6723526
Prupe.1G093900.1	C2C2-CO-like	TF	Pp01	7237624	7239570
Prupe.1G097300.1	GNAT	TR	Pp01	7762805	7765680
Prupe.1G097300.2	GNAT	TR	Pp01	7761009	7765680
Prupe.1G097300.3	GNAT	TR	Pp01	7762805	7765680
Prupe.1G097300.5	GNAT	TR	Pp01	7762805	7765680
Prupe.1G097300.6	GNAT	TR	Pp01	7762805	7765680
Prupe.1G101500.1	SET	TR	Pp01	8078426	8087002
Prupe.1G101500.2	SET	TR	Pp01	8078426	8086982
Prupe.1G101500.3	SET	TR	Pp01	8078426	8086968
Prupe.1G101600.1	AP2/ERF-AP2	TF	Pp01	8096443	8099112
Prupe.1G103200.1	SNF2	TR	Pp01	8248428	8256348
Prupe.1G106100.1	NAC	TF	Pp01	8505856	8506968
Prupe.1G106500.1	SBP	TF	Pp01	8542094	8549335
Prupe.1G106500.2	SBP	TF	Pp01	8542147	8549299
Prupe.1G106600.1	SBP	TF	Pp01	8549838	8556894
Prupe.1G108700.1	CAMTA	TF	Pp01	8686253	8694389
Prupe.1G108700.2	CAMTA	TF	Pp01	8686161	8694424
Prupe.1G108700.3	CAMTA	TF	Pp01	8686178	8694436
Prupe.1G108700.4	CAMTA	TF	Pp01	8686172	8694424
Prupe.1G108700.5	CAMTA	TF	Pp01	8686351	8694424
Prupe.1G111700.1	MYB	TF	Pp01	8920296	8922733
Prupe.1G114800.1	WRKY	TF	Pp01	9088961	9091839
Prupe.1G118400.1	GNAT	TR	Pp01	9298287	9301695
Prupe.1G118400.2	GNAT	TR	Pp01	9298283	9301708
Prupe.1G118400.3	GNAT	TR	Pp01	9298283	9301695
Prupe.1G118400.4	GNAT	TR	Pp01	9298285	9301695
Prupe.1G119100.1	GRAS	TF	Pp01	9323354	9325141
Prupe.1G119200.1	GRAS	TF	Pp01	9326642	9327967
Prupe.1G122800.1	CAMTA	TF	Pp01	9623357	9632236
Prupe.1G122800.2	CAMTA	TF	Pp01	9623357	9632236
Prupe.1G122800.3	CAMTA	TF	Pp01	9623357	9632236
Prupe.1G122800.4	CAMTA	TF	Pp01	9623357	9632236
Prupe.1G125300.1	MYB	TF	Pp01	9879635	9882041
Prupe.1G125700.1	FAR1	TF	Pp01	9905927	9910211
Prupe.1G125700.2	FAR1	TF	Pp01	9905861	9910214
Prupe.1G125700.3	FAR1	TF	Pp01	9905910	9910211
Prupe.1G125700.4	FAR1	TF	Pp01	9905927	9910211
Prupe.1G126000.1	C2C2-GATA	TF	Pp01	9922785	9924146
Prupe.1G126400.1	GARP-ARR-B	TF	Pp01	9945779	9950086
Prupe.1G126400.2	GARP-ARR-B	TF	Pp01	9945784	9950086
Prupe.1G130300.1	AP2/ERF-ERF	TF	Pp01	10131681	10133753
Prupe.1G130300.2	AP2/ERF-ERF	TF	Pp01	10131681	10133753
Prupe.1G135400.1	TRAF	TR	Pp01	10671565	10676998
Prupe.1G135400.2	TRAF	TR	Pp01	10671565	10676998
Prupe.1G135400.4	TRAF	TR	Pp01	10673093	10676998
Prupe.1G138500.1	NF-YB	TF	Pp01	10829440	10830284
Prupe.1G139300.1	MYB-related	TF	Pp01	10900719	10911856
Prupe.1G139300.2	MYB-related	TF	Pp01	10900709	10911856
Prupe.1G139300.3	MYB-related	TF	Pp01	10900719	10911856
Prupe.1G139300.4	MYB-related	TF	Pp01	10900719	10911856
Prupe.1G139300.5	MYB-related	TF	Pp01	10900719	10910674
Prupe.1G139300.6	MYB-related	TF	Pp01	10900719	10910674
Prupe.1G139300.7	MYB-related	TF	Pp01	10903063	10911856
Prupe.1G139300.8	MYB-related	TF	Pp01	10903898	10911856
Prupe.1G139300.9	MYB-related	TF	Pp01	10903898	10911856
Prupe.1G139500.1	C3H	TF	Pp01	10934448	10938704
Prupe.1G139600.1	AP2/ERF-ERF	TF	Pp01	10939962	10941439
Prupe.1G140700.1	SNF2	TR	Pp01	11056142	11062993
Prupe.1G140700.2	SNF2	TR	Pp01	11055766	11063113
Prupe.1G140700.3	SNF2	TR	Pp01	11057415	11062995
Prupe.1G142500.1	TUB	TF	Pp01	11202779	11205982
Prupe.1G142500.2	TUB	TF	Pp01	11202764	11205980
Prupe.1G143200.1	SNF2	TR	Pp01	11275291	11293124
Prupe.1G144600.1	SBP	TF	Pp01	11351929	11359238
Prupe.1G148400.1	FAR1	TF	Pp01	11642387	11646269
Prupe.1G148400.2	FAR1	TF	Pp01	11642387	11646198
Prupe.1G151800.1	bHLH	TF	Pp01	11987440	11988815
Prupe.1G152500.1	NF-YC	TF	Pp01	12042456	12046186
Prupe.1G152500.2	NF-YC	TF	Pp01	12042427	12046186
Prupe.1G152500.3	NF-YC	TF	Pp01	12042456	12046186
Prupe.1G152500.4	NF-YC	TF	Pp01	12042573	12046186
Prupe.1G152500.5	NF-YC	TF	Pp01	12042862	12046186
Prupe.1G152500.6	NF-YC	TF	Pp01	12042875	12046186
Prupe.1G154600.1	SNF2	TR	Pp01	12192870	12202778
Prupe.1G154600.2	SNF2	TR	Pp01	12192870	12202778
Prupe.1G155300.1	TRAF	TR	Pp01	12269167	12275600
Prupe.1G155300.2	TRAF	TR	Pp01	12269609	12275388
Prupe.1G165500.1	HSF	TF	Pp01	13406649	13412067
Prupe.1G168600.1	MADS-M-type	TF	Pp01	13733550	13734767
Prupe.1G168700.1	MADS-M-type	TF	Pp01	13742342	13742769
Prupe.1G168900.1	MADS-M-type	TF	Pp01	13783223	13784329
Prupe.1G170500.1	C2H2	TF	Pp01	14049502	14056716
Prupe.1G170500.2	C2H2	TF	Pp01	14049502	14056716
Prupe.1G173300.1	bHLH	TF	Pp01	14478736	14481809
Prupe.1G173300.2	bHLH	TF	Pp01	14478736	14481809
Prupe.1G177800.1	PHD	TR	Pp01	15205630	15220565
Prupe.1G177800.2	PHD	TR	Pp01	15205630	15220531
Prupe.1G177800.3	PHD	TR	Pp01	15205842	15220283
Prupe.1G177800.4	PHD	TR	Pp01	15206031	15220283
Prupe.1G181300.1	bHLH	TF	Pp01	15893218	15900021
Prupe.1G181300.2	bHLH	TF	Pp01	15892648	15900021
Prupe.1G181600.1	MED7	TR	Pp01	15907946	15910518
Prupe.1G181600.2	MED7	TR	Pp01	15908458	15910518
Prupe.1G188100.1	Others	TR	Pp01	17219753	17222311
Prupe.1G188100.2	Others	TR	Pp01	17219741	17222301
Prupe.1G188100.3	Others	TR	Pp01	17219741	17221227
Prupe.1G194600.1	FAR1	TF	Pp01	18386099	18388271
Prupe.1G195600.10	FAR1	TF	Pp01	18522815	18524032
Prupe.1G195600.1	FAR1	TF	Pp01	18520086	18524068
Prupe.1G195600.2	FAR1	TF	Pp01	18520112	18524069
Prupe.1G195600.3	FAR1	TF	Pp01	18520127	18524032
Prupe.1G195600.4	FAR1	TF	Pp01	18520127	18524032
Prupe.1G195600.5	FAR1	TF	Pp01	18520127	18524032
Prupe.1G195600.6	FAR1	TF	Pp01	18520127	18524032
Prupe.1G195600.7	FAR1	TF	Pp01	18520127	18524032
Prupe.1G195600.8	FAR1	TF	Pp01	18520127	18524032
Prupe.1G195600.9	FAR1	TF	Pp01	18520893	18524069
Prupe.1G195700.1	FAR1	TF	Pp01	18541305	18547430
Prupe.1G195700.2	FAR1	TF	Pp01	18541305	18546270
Prupe.1G195800.1	FAR1	TF	Pp01	18654026	18657517
Prupe.1G195800.2	FAR1	TF	Pp01	18654056	18656326
Prupe.1G195900.1	FAR1	TF	Pp01	18661783	18665653
Prupe.1G195900.2	FAR1	TF	Pp01	18661783	18665653
Prupe.1G195900.3	FAR1	TF	Pp01	18661783	18665653
Prupe.1G195900.4	FAR1	TF	Pp01	18661783	18665653
Prupe.1G195900.5	FAR1	TF	Pp01	18661783	18665653
Prupe.1G195900.6	FAR1	TF	Pp01	18663416	18665653
Prupe.1G196000.1	FAR1	TF	Pp01	18683810	18690609
Prupe.1G196000.2	FAR1	TF	Pp01	18683810	18690609
Prupe.1G196000.3	FAR1	TF	Pp01	18683810	18690609
Prupe.1G196000.4	FAR1	TF	Pp01	18683810	18690609
Prupe.1G196000.5	FAR1	TF	Pp01	18683810	18690609
Prupe.1G196000.6	FAR1	TF	Pp01	18683810	18690609
Prupe.1G196000.7	FAR1	TF	Pp01	18683810	18690609
Prupe.1G196400.1	FAR1	TF	Pp01	18752291	18755471
Prupe.1G197100.1	DBB	TF	Pp01	18805003	18808949
Prupe.1G197700.1	bZIP	TF	Pp01	18896781	18901932
Prupe.1G197700.2	bZIP	TF	Pp01	18896832	18901760
Prupe.1G199300.1	GRAS	TF	Pp01	19270496	19271845
Prupe.1G200100.1	RWP-RK	TF	Pp01	19544181	19551790
Prupe.1G208300.1	AUX/IAA	TR	Pp01	22237670	22239403
Prupe.1G208300.2	AUX/IAA	TR	Pp01	22237670	22239403
Prupe.1G208500.1	bZIP	TF	Pp01	22267271	22269438
Prupe.1G208500.2	bZIP	TF	Pp01	22267271	22269438
Prupe.1G210500.1	SET	TR	Pp01	22416001	22417264
Prupe.1G212700.1	AP2/ERF-ERF	TF	Pp01	22624822	22625652
Prupe.1G213700.1	bHLH	TF	Pp01	22692526	22693956
Prupe.1G214900.1	AP2/ERF-ERF	TF	Pp01	22789141	22791923
Prupe.1G216000.1	SET	TR	Pp01	22909481	22916768
Prupe.1G216000.2	SET	TR	Pp01	22911102	22916768
Prupe.1G216100.1	Trihelix	TF	Pp01	22934299	22937268
Prupe.1G217700.1	bHLH	TF	Pp01	23073009	23075208
Prupe.1G217700.2	bHLH	TF	Pp01	23073009	23075208
Prupe.1G218500.1	Tify	TF	Pp01	23337738	23339949
Prupe.1G219800.1	C2C2-CO-like	TF	Pp01	23421277	23424076
Prupe.1G220400.1	NAC	TF	Pp01	23497788	23499637
Prupe.1G222000.1	TCP	TF	Pp01	23627208	23629584
Prupe.1G223100.1	FAR1	TF	Pp01	23692229	23693984
Prupe.1G223200.1	WRKY	TF	Pp01	23707911	23710210
Prupe.1G223500.1	SBP	TF	Pp01	23739022	23742227
Prupe.1G223500.2	SBP	TF	Pp01	23738923	23742273
Prupe.1G223500.3	SBP	TF	Pp01	23738923	23742268
Prupe.1G223500.4	SBP	TF	Pp01	23738924	23742260
Prupe.1G223500.5	SBP	TF	Pp01	23739015	23742263
Prupe.1G223500.6	SBP	TF	Pp01	23739718	23742227
Prupe.1G223600.1	MADS-MIKC	TF	Pp01	23749662	23754532
Prupe.1G224000.1	CAMTA	TF	Pp01	23777968	23784786
Prupe.1G224000.2	CAMTA	TF	Pp01	23778096	23784783
Prupe.1G224000.3	CAMTA	TF	Pp01	23778096	23784722
Prupe.1G224300.1	Others	TR	Pp01	23790270	23797640
Prupe.1G224900.1	SBP	TF	Pp01	23865042	23870556
Prupe.1G224900.2	SBP	TF	Pp01	23865004	23871249
Prupe.1G224900.3	SBP	TF	Pp01	23865482	23870486
Prupe.1G224900.4	SBP	TF	Pp01	23865045	23869471
Prupe.1G224900.5	SBP	TF	Pp01	23865482	23869472
Prupe.1G224900.6	SBP	TF	Pp01	23866705	23869301
Prupe.1G226700.1	NF-YC	TF	Pp01	24013089	24015470
Prupe.1G226700.2	NF-YC	TF	Pp01	24013089	24015470
Prupe.1G226700.3	NF-YC	TF	Pp01	24013089	24014550
Prupe.1G234600.1	NAC	TF	Pp01	24857188	24857640
Prupe.1G235200.1	Trihelix	TF	Pp01	24892813	24897195
Prupe.1G237500.1	GRAS	TF	Pp01	25203094	25204641
Prupe.1G238200.1	GARP-ARR-B	TF	Pp01	25288069	25293404
Prupe.1G238200.2	GARP-ARR-B	TF	Pp01	25287276	25292978
Prupe.1G238200.3	GARP-ARR-B	TF	Pp01	25288082	25292979
Prupe.1G238200.4	GARP-G2-like	TF	Pp01	25288146	25292978
Prupe.1G238200.5	GARP-ARR-B	TF	Pp01	25288146	25292978
Prupe.1G245500.1	AP2/ERF-ERF	TF	Pp01	25909218	25910911
Prupe.1G249600.1	HB-KNOX	TF	Pp01	26178706	26183860
Prupe.1G250500.1	C2C2-YABBY	TF	Pp01	26248367	26249994
Prupe.1G252600.1	bHLH	TF	Pp01	26368408	26371360
Prupe.1G253400.1	MYB	TF	Pp01	26440293	26441616
Prupe.1G258300.1	GNAT	TR	Pp01	26809986	26811701
Prupe.1G259000.1	GNAT	TR	Pp01	26843928	26845935
Prupe.1G260700.1	C2H2	TF	Pp01	26961662	26962928
Prupe.1G261500.1	Others	TR	Pp01	27026187	27027940
Prupe.1G262300.1	Others	TR	Pp01	27084193	27094148
Prupe.1G262300.2	Others	TR	Pp01	27084193	27094148
Prupe.1G262300.3	Others	TR	Pp01	27084193	27094148
Prupe.1G262300.4	Others	TR	Pp01	27084193	27094148
Prupe.1G262700.1	MYB-related	TF	Pp01	27125297	27127564
Prupe.1G263800.1	bHLH	TF	Pp01	27248745	27252137
Prupe.1G267300.1	HB-HD-ZIP	TF	Pp01	27479026	27481456
Prupe.1G267300.2	HB-HD-ZIP	TF	Pp01	27479026	27481456
Prupe.1G267300.3	HB-HD-ZIP	TF	Pp01	27479026	27481456
Prupe.1G268800.1	AP2/ERF-AP2	TF	Pp01	27612739	27614687
Prupe.1G269100.1	Whirly	TF	Pp01	27624570	27627359
Prupe.1G269200.1	WRKY	TF	Pp01	27648522	27651771
Prupe.1G269200.2	WRKY	TF	Pp01	27648447	27651771
Prupe.1G271100.10	MYB	TF	Pp01	27819714	27824710
Prupe.1G271100.11	MYB	TF	Pp01	27819714	27824710
Prupe.1G271100.12	MYB	TF	Pp01	27819714	27824710
Prupe.1G271100.13	MYB	TF	Pp01	27819714	27824710
Prupe.1G271100.14	MYB	TF	Pp01	27819714	27824710
Prupe.1G271100.15	MYB	TF	Pp01	27819714	27824710
Prupe.1G271100.16	MYB	TF	Pp01	27819714	27824710
Prupe.1G271100.1	MYB	TF	Pp01	27819027	27824909
Prupe.1G271100.2	MYB	TF	Pp01	27819027	27824897
Prupe.1G271100.3	MYB	TF	Pp01	27818925	27824751
Prupe.1G271100.4	MYB	TF	Pp01	27818925	27824751
Prupe.1G271100.5	MYB	TF	Pp01	27819027	27824733
Prupe.1G271100.6	MYB	TF	Pp01	27819027	27824733
Prupe.1G271100.7	MYB	TF	Pp01	27819027	27824710
Prupe.1G271100.8	MYB	TF	Pp01	27819027	27824710
Prupe.1G271100.9	MYB	TF	Pp01	27819714	27824710
Prupe.1G271400.1	HB-HD-ZIP	TF	Pp01	27837738	27840056
Prupe.1G271400.2	HB-HD-ZIP	TF	Pp01	27837763	27840056
Prupe.1G271700.1	bHLH	TF	Pp01	27854746	27856083
Prupe.1G272500.1	TCP	TF	Pp01	27911951	27915862
Prupe.1G274300.1	NAC	TF	Pp01	28043845	28045782
Prupe.1G274700.1	zf-HD	TF	Pp01	28058395	28059444
Prupe.1G275900.1	GARP-G2-like	TF	Pp01	28124969	28127186
Prupe.1G276000.1	C2C2-Dof	TF	Pp01	28142303	28145914
Prupe.1G276300.1	MYB	TF	Pp01	28157190	28160241
Prupe.1G276500.1	mTERF	TR	Pp01	28174606	28175988
Prupe.1G276600.1	MADS-M-type	TF	Pp01	28177961	28182950
Prupe.1G276600.2	MADS-M-type	TF	Pp01	28178029	28182950
Prupe.1G276600.5	MADS-M-type	TF	Pp01	28178407	28182950
Prupe.1G276600.6	MADS-M-type	TF	Pp01	28178408	28182950
Prupe.1G277500.1	NAC	TF	Pp01	28214649	28216118
Prupe.1G278000.1	SET	TR	Pp01	28256594	28258156
Prupe.1G278200.1	MYB	TF	Pp01	28263973	28265613
Prupe.1G278900.1	SET	TR	Pp01	28314722	28317391
Prupe.1G280700.1	WRKY	TF	Pp01	28417709	28420876
Prupe.1G280700.2	WRKY	TF	Pp01	28417709	28420876
Prupe.1G283500.1	WRKY	TF	Pp01	28556367	28560635
Prupe.1G283600.1	C2H2	TF	Pp01	28565263	28566912
Prupe.1G284800.1	NAC	TF	Pp01	28610413	28612621
Prupe.1G284900.1	NAC	TF	Pp01	28616906	28619692
Prupe.1G284900.2	NAC	TF	Pp01	28616906	28619692
Prupe.1G284900.3	NAC	TF	Pp01	28616906	28619692
Prupe.1G284900.4	NAC	TF	Pp01	28616906	28619692
Prupe.1G284900.5	NAC	TF	Pp01	28616906	28619692
Prupe.1G287400.1	AUX/IAA	TR	Pp01	28741234	28742800
Prupe.1G290100.1	C2C2-YABBY	TF	Pp01	28896339	28898315
Prupe.1G290100.2	C2C2-YABBY	TF	Pp01	28896143	28898315
Prupe.1G290100.3	C2C2-YABBY	TF	Pp01	28896337	28898315
Prupe.1G290200.1	SBP	TF	Pp01	28899733	28904841
Prupe.1G290200.2	SBP	TF	Pp01	28899647	28904912
Prupe.1G290200.3	SBP	TF	Pp01	28899726	28904912
Prupe.1G290200.4	SBP	TF	Pp01	28899726	28904912
Prupe.1G290200.5	SBP	TF	Pp01	28899726	28904912
Prupe.1G290200.6	SBP	TF	Pp01	28900201	28904912
Prupe.1G290200.7	SBP	TF	Pp01	28900231	28904912
Prupe.1G290500.1	MADS-MIKC	TF	Pp01	28921555	28925376
Prupe.1G290600.1	MADS-MIKC	TF	Pp01	28929210	28932070
Prupe.1G294200.1	bHLH	TF	Pp01	29143677	29146599
Prupe.1G294200.2	bHLH	TF	Pp01	29142789	29146806
Prupe.1G297200.10	bHLH	TF	Pp01	29326002	29329884
Prupe.1G297200.11	bHLH	TF	Pp01	29326008	29329884
Prupe.1G297200.12	bHLH	TF	Pp01	29326008	29329882
Prupe.1G297200.13	bHLH	TF	Pp01	29326008	29329877
Prupe.1G297200.14	bHLH	TF	Pp01	29326012	29329877
Prupe.1G297200.15	bHLH	TF	Pp01	29326012	29329877
Prupe.1G297200.16	bHLH	TF	Pp01	29326012	29329844
Prupe.1G297200.1	bHLH	TF	Pp01	29326012	29329844
Prupe.1G297200.2	bHLH	TF	Pp01	29325951	29329985
Prupe.1G297200.3	bHLH	TF	Pp01	29325952	29329985
Prupe.1G297200.4	bHLH	TF	Pp01	29326008	29329985
Prupe.1G297200.5	bHLH	TF	Pp01	29326012	29329985
Prupe.1G297200.6	bHLH	TF	Pp01	29326012	29329985
Prupe.1G297200.7	bHLH	TF	Pp01	29325978	29329931
Prupe.1G297200.8	bHLH	TF	Pp01	29325979	29329884
Prupe.1G297200.9	bHLH	TF	Pp01	29325979	29329883
Prupe.1G298200.1	bZIP	TF	Pp01	29410282	29411546
Prupe.1G298700.1	GNAT	TR	Pp01	29424280	29425084
Prupe.1G300700.1	MED7	TR	Pp01	29532239	29533669
Prupe.1G304700.1	TCP	TF	Pp01	29836059	29840381
Prupe.1G304900.1	bHLH	TF	Pp01	29856388	29859711
Prupe.1G305300.1	NAC	TF	Pp01	29886383	29889969
Prupe.1G305300.2	NAC	TF	Pp01	29886383	29890011
Prupe.1G305900.1	AP2/ERF-RAV	TF	Pp01	29921011	29923272
Prupe.1G306200.1	C2H2	TF	Pp01	29933396	29935032
Prupe.1G306300.1	GARP-G2-like	TF	Pp01	29939830	29944129
Prupe.1G307300.1	bZIP	TF	Pp01	30004951	30009389
Prupe.1G307300.2	bZIP	TF	Pp01	30004951	30009389
Prupe.1G307300.3	bZIP	TF	Pp01	30004951	30009389
Prupe.1G307300.4	bZIP	TF	Pp01	30004951	30009389
Prupe.1G307300.5	bZIP	TF	Pp01	30005792	30009389
Prupe.1G310100.1	AP2/ERF-ERF	TF	Pp01	30162819	30164226
Prupe.1G310900.1	C2C2-CO-like	TF	Pp01	30217941	30220164
Prupe.1G311000.1	LOB	TF	Pp01	30221710	30222995
Prupe.1G313200.1	bHLH	TF	Pp01	30337242	30339113
Prupe.1G313200.2	bHLH	TF	Pp01	30337492	30338868
Prupe.1G313300.1	MYB	TF	Pp01	30343380	30344967
Prupe.1G317000.1	AUX/IAA	TR	Pp01	30532265	30533090
Prupe.1G317900.1	Others	TR	Pp01	30588472	30591769
Prupe.1G318500.1	C3H	TF	Pp01	30614504	30617644
Prupe.1G323400.1	MYB	TF	Pp01	30884180	30886207
Prupe.1G325000.1	HB-HD-ZIP	TF	Pp01	30996000	30998916
Prupe.1G325000.2	HB-HD-ZIP	TF	Pp01	30996000	30998916
Prupe.1G329600.1	GRAS	TF	Pp01	31282447	31283783
Prupe.1G331500.1	Tify	TF	Pp01	31407579	31411166
Prupe.1G331500.2	Tify	TF	Pp01	31408411	31411166
Prupe.1G331600.1	C2H2	TF	Pp01	31416639	31420005
Prupe.1G331600.2	C2H2	TF	Pp01	31417328	31420005
Prupe.1G332800.1	SET	TR	Pp01	31516386	31520261
Prupe.1G332800.2	SET	TR	Pp01	31516386	31520261
Prupe.1G332800.3	SET	TR	Pp01	31516386	31520261
Prupe.1G332800.4	SET	TR	Pp01	31516386	31519241
Prupe.1G334200.1	GARP-ARR-B	TF	Pp01	31601108	31606393
Prupe.1G335100.1	HSF	TF	Pp01	31664746	31667517
Prupe.1G335800.1	PLATZ	TF	Pp01	31692633	31695090
Prupe.1G336400.1	Others	TR	Pp01	31737463	31744740
Prupe.1G336400.2	Others	TR	Pp01	31737509	31744740
Prupe.1G336500.1	C2H2	TF	Pp01	31752712	31756630
Prupe.1G336500.2	C2H2	TF	Pp01	31752712	31756625
Prupe.1G336500.3	C2H2	TF	Pp01	31752712	31756625
Prupe.1G336500.4	C2H2	TF	Pp01	31752712	31756625
Prupe.1G336500.5	C2H2	TF	Pp01	31752712	31756625
Prupe.1G336500.6	C2H2	TF	Pp01	31753478	31756625
Prupe.1G338500.1	BBR-BPC	TF	Pp01	31877949	31880177
Prupe.1G338500.2	BBR-BPC	TF	Pp01	31877949	31880177
Prupe.1G338600.1	PHD	TR	Pp01	31881761	31884436
Prupe.1G338700.1	C2H2	TF	Pp01	31888326	31891434
Prupe.1G340500.1	GARP-G2-like	TF	Pp01	32013578	32017593
Prupe.1G340500.2	GARP-G2-like	TF	Pp01	32013578	32017593
Prupe.1G341000.1	C2H2	TF	Pp01	32046224	32051679
Prupe.1G341000.2	C2H2	TF	Pp01	32046224	32051679
Prupe.1G341100.1	C2H2	TF	Pp01	32054649	32059083
Prupe.1G341200.1	SNF2	TR	Pp01	32068297	32073345
Prupe.1G341200.2	SNF2	TR	Pp01	32068297	32073345
Prupe.1G342700.1	C3H	TF	Pp01	32162952	32166912
Prupe.1G349000.1	Rcd1-like	TR	Pp01	32552850	32558066
Prupe.1G349000.2	Rcd1-like	TR	Pp01	32552850	32558066
Prupe.1G349000.3	Rcd1-like	TR	Pp01	32552850	32558066
Prupe.1G349700.1	MYB	TF	Pp01	32592857	32596510
Prupe.1G350600.1	SNF2	TR	Pp01	32639471	32649007
Prupe.1G350600.2	SNF2	TR	Pp01	32639493	32648967
Prupe.1G350600.3	SNF2	TR	Pp01	32639493	32648967
Prupe.1G350600.4	SNF2	TR	Pp01	32639493	32648967
Prupe.1G350700.1	HMG	TR	Pp01	32649758	32651631
Prupe.1G353500.1	SWI/SNF-BAF60b	TR	Pp01	32879333	32880116
Prupe.1G356300.1	SWI/SNF-SWI3	TR	Pp01	33028895	33032192
Prupe.1G358300.1	ARID	TR	Pp01	33149988	33154087
Prupe.1G363500.1	IWS1	TR	Pp01	33423665	33430165
Prupe.1G366300.1	C2H2	TF	Pp01	33574701	33576529
Prupe.1G366800.1	E2F-DP	TF	Pp01	33597634	33602421
Prupe.1G366800.2	E2F-DP	TF	Pp01	33597634	33602421
Prupe.1G366800.3	E2F-DP	TF	Pp01	33597634	33602421
Prupe.1G366800.4	E2F-DP	TF	Pp01	33597640	33602421
Prupe.1G366800.5	E2F-DP	TF	Pp01	33597640	33602421
Prupe.1G368300.1	B3-ARF	TF	Pp01	33696212	33702426
Prupe.1G368900.1	C3H	TF	Pp01	33715902	33720962
Prupe.1G369300.1	bZIP	TF	Pp01	33736783	33740651
Prupe.1G369300.2	bZIP	TF	Pp01	33736783	33740651
Prupe.1G369400.1	BBR-BPC	TF	Pp01	33743529	33746308
Prupe.1G369400.2	BBR-BPC	TF	Pp01	33743529	33746300
Prupe.1G369400.3	BBR-BPC	TF	Pp01	33743939	33745407
Prupe.1G370000.1	SWI/SNF-SWI3	TR	Pp01	33775081	33785452
Prupe.1G370000.2	SWI/SNF-SWI3	TR	Pp01	33775081	33785452
Prupe.1G370000.3	SWI/SNF-SWI3	TR	Pp01	33775081	33785433
Prupe.1G370000.4	SWI/SNF-SWI3	TR	Pp01	33775081	33785433
Prupe.1G371100.1	Others	TR	Pp01	33832435	33834269
Prupe.1G371100.2	DBB	TF	Pp01	33832435	33834269
Prupe.1G371300.1	MADS-MIKC	TF	Pp01	33846755	33849607
Prupe.1G371300.2	MADS-MIKC	TF	Pp01	33846657	33849629
Prupe.1G371300.3	MADS-MIKC	TF	Pp01	33846657	33849629
Prupe.1G371300.4	MADS-MIKC	TF	Pp01	33846716	33849607
Prupe.1G371300.5	MADS-MIKC	TF	Pp01	33846742	33849613
Prupe.1G371300.6	MADS-MIKC	TF	Pp01	33846742	33849609
Prupe.1G371300.7	MADS-MIKC	TF	Pp01	33846660	33849165
Prupe.1G371500.1	SRS	TF	Pp01	33860982	33863529
Prupe.1G371500.2	SRS	TF	Pp01	33860982	33863529
Prupe.1G372100.1	AP2/ERF-ERF	TF	Pp01	33888993	33891933
Prupe.1G373600.1	HB-BELL	TF	Pp01	33968413	33971923
Prupe.1G373600.2	HB-BELL	TF	Pp01	33968420	33971925
Prupe.1G373600.3	HB-BELL	TF	Pp01	33968808	33971913
Prupe.1G373600.4	HB-BELL	TF	Pp01	33968982	33971902
Prupe.1G373700.1	HB-BELL	TF	Pp01	33972035	33976068
Prupe.1G373700.2	HB-BELL	TF	Pp01	33972036	33976037
Prupe.1G373700.3	HB-BELL	TF	Pp01	33973129	33975945
Prupe.1G373700.4	HB-BELL	TF	Pp01	33973188	33975945
Prupe.1G373700.5	HB-BELL	TF	Pp01	33973188	33975945
Prupe.1G374400.1	bZIP	TF	Pp01	34000399	34001332
Prupe.1G377700.1	TUB	TF	Pp01	34168773	34172431
Prupe.1G377700.2	TUB	TF	Pp01	34168773	34172431
Prupe.1G378000.1	MYB-related	TF	Pp01	34178731	34181182
Prupe.1G378200.1	zf-HD	TF	Pp01	34184968	34186786
Prupe.1G378200.2	zf-HD	TF	Pp01	34184622	34186793
Prupe.1G378200.3	zf-HD	TF	Pp01	34184643	34186786
Prupe.1G378200.4	zf-HD	TF	Pp01	34184968	34186811
Prupe.1G381100.1	OFP	TF	Pp01	34339893	34340903
Prupe.1G381800.1	C2H2	TF	Pp01	34371544	34375526
Prupe.1G382900.1	BES1	TF	Pp01	34411146	34412907
Prupe.1G383200.1	NAC	TF	Pp01	34421802	34426682
Prupe.1G383200.2	NAC	TF	Pp01	34423337	34426731
Prupe.1G383200.3	NAC	TF	Pp01	34423532	34426726
Prupe.1G383200.4	NAC	TF	Pp01	34423903	34426682
Prupe.1G384500.1	Others	TR	Pp01	34484968	34490426
Prupe.1G384500.3	Others	TR	Pp01	34484987	34490162
Prupe.1G384500.4	Others	TR	Pp01	34484987	34489779
Prupe.1G387800.1	GARP-G2-like	TF	Pp01	34688320	34691858
Prupe.1G388000.1	B3	TF	Pp01	34699558	34701441
Prupe.1G388000.2	B3	TF	Pp01	34699558	34701079
Prupe.1G388100.1	B3	TF	Pp01	34704470	34707052
Prupe.1G388200.1	B3	TF	Pp01	34707930	34711759
Prupe.1G388200.2	B3	TF	Pp01	34707930	34711759
Prupe.1G388300.1	B3	TF	Pp01	34712908	34715588
Prupe.1G388600.1	C2C2-Dof	TF	Pp01	34732476	34734899
Prupe.1G388600.2	C2C2-Dof	TF	Pp01	34732476	34735048
Prupe.1G390000.1	NAC	TF	Pp01	34813332	34814859
Prupe.1G390800.1	AP2/ERF-ERF	TF	Pp01	34842031	34843343
Prupe.1G391400.1	GARP-ARR-B	TF	Pp01	34875038	34879545
Prupe.1G391400.2	GARP-ARR-B	TF	Pp01	34875038	34879545
Prupe.1G391600.1	PHD	TR	Pp01	34887015	34901463
Prupe.1G393000.1	WRKY	TF	Pp01	34983112	34985123
Prupe.1G393100.1	WRKY	TF	Pp01	35002956	35004822
Prupe.1G396900.1	C3H	TF	Pp01	35170660	35173581
Prupe.1G398700.1	C2C2-CO-like	TF	Pp01	35275776	35277577
Prupe.1G398700.2	DBB	TF	Pp01	35275776	35277215
Prupe.1G400900.1	Others	TR	Pp01	35396792	35401964
Prupe.1G400900.2	Others	TR	Pp01	35396792	35401274
Prupe.1G400900.3	Others	TR	Pp01	35396792	35401274
Prupe.1G404700.1	MYB	TF	Pp01	35615203	35616518
Prupe.1G405000.1	Trihelix	TF	Pp01	35625833	35628523
Prupe.1G405000.2	Trihelix	TF	Pp01	35625852	35630758
Prupe.1G405000.3	Trihelix	TF	Pp01	35625856	35628351
Prupe.1G405100.1	MYB	TF	Pp01	35628282	35629902
Prupe.1G405200.1	MYB	TF	Pp01	35635408	35636985
Prupe.1G405300.1	MYB	TF	Pp01	35640810	35642163
Prupe.1G405400.1	MYB	TF	Pp01	35645763	35647480
Prupe.1G406500.1	RWP-RK	TF	Pp01	35700963	35703103
Prupe.1G406800.1	Alfin-like	TF	Pp01	35708170	35711085
Prupe.1G406800.2	Alfin-like	TF	Pp01	35709269	35711085
Prupe.1G407500.1	WRKY	TF	Pp01	35730554	35731680
Prupe.1G410400.1	HSF	TF	Pp01	35869592	35872208
Prupe.1G410400.2	HSF	TF	Pp01	35869392	35872190
Prupe.1G410400.3	HSF	TF	Pp01	35869392	35872190
Prupe.1G410400.4	HSF	TF	Pp01	35869609	35872208
Prupe.1G410400.5	HSF	TF	Pp01	35869620	35872190
Prupe.1G410400.6	HSF	TF	Pp01	35869620	35872190
Prupe.1G410400.7	HSF	TF	Pp01	35869648	35872190
Prupe.1G410400.8	HSF	TF	Pp01	35869658	35872190
Prupe.1G410700.1	C2H2	TF	Pp01	35889034	35892412
Prupe.1G410700.2	C2H2	TF	Pp01	35889034	35892412
Prupe.1G411200.1	LOB	TF	Pp01	35911445	35912561
Prupe.1G412000.1	C2C2-GATA	TF	Pp01	35956602	35958525
Prupe.1G413400.1	MYB-related	TF	Pp01	36022864	36024302
Prupe.1G413700.1	HB-BELL	TF	Pp01	36034426	36036739
Prupe.1G416400.1	MYB	TF	Pp01	36150354	36152252
Prupe.1G416400.2	MYB	TF	Pp01	36150286	36152202
Prupe.1G416500.1	C3H	TF	Pp01	36156265	36157816
Prupe.1G416700.1	HB-KNOX	TF	Pp01	36176926	36180792
Prupe.1G416800.1	HB-HD-ZIP	TF	Pp01	36184542	36186251
Prupe.1G417400.1	MYB	TF	Pp01	36213747	36215842
Prupe.1G418500.1	bHLH	TF	Pp01	36270141	36274150
Prupe.1G418500.2	bHLH	TF	Pp01	36270141	36274150
Prupe.1G418500.3	bHLH	TF	Pp01	36270161	36274104
Prupe.1G418500.4	bHLH	TF	Pp01	36270161	36274104
Prupe.1G418600.1	AP2/ERF-AP2	TF	Pp01	36281133	36285384
Prupe.1G419000.1	GRF	TF	Pp01	36302980	36306676
Prupe.1G419000.2	GRF	TF	Pp01	36304213	36306676
Prupe.1G419700.1	bZIP	TF	Pp01	36338097	36338537
Prupe.1G422200.1	LIM	TF	Pp01	36454502	36456624
Prupe.1G422200.2	LIM	TF	Pp01	36454698	36463431
Prupe.1G422200.3	LIM	TF	Pp01	36454501	36456732
Prupe.1G422200.4	LIM	TF	Pp01	36454501	36456664
Prupe.1G422200.5	LIM	TF	Pp01	36454502	36456624
Prupe.1G423000.1	PHD	TR	Pp01	36493275	36494880
Prupe.1G424100.1	bHLH	TF	Pp01	36554410	36555781
Prupe.1G424300.1	C2H2	TF	Pp01	36578737	36579899
Prupe.1G424400.1	LOB	TF	Pp01	36583627	36585209
Prupe.1G427500.1	MADS-M-type	TF	Pp01	36741814	36743695
Prupe.1G427600.1	MADS-M-type	TF	Pp01	36745069	36745463
Prupe.1G430000.1	MYB	TF	Pp01	36870086	36872519
Prupe.1G431100.1	WRKY	TF	Pp01	36937969	36942350
Prupe.1G431100.2	WRKY	TF	Pp01	36937084	36942350
Prupe.1G431900.1	C2H2	TF	Pp01	36986464	36987747
Prupe.1G432000.1	AP2/ERF-ERF	TF	Pp01	36992321	36992855
Prupe.1G432100.1	HB-WOX	TF	Pp01	37002438	37004290
Prupe.1G432600.1	NAC	TF	Pp01	37026264	37029407
Prupe.1G432600.2	NAC	TF	Pp01	37026200	37029641
Prupe.1G432600.3	NAC	TF	Pp01	37026264	37028107
Prupe.1G432800.1	bHLH	TF	Pp01	37040598	37043574
Prupe.1G432900.1	bHLH	TF	Pp01	37044597	37046246
Prupe.1G433500.1	HSF	TF	Pp01	37080107	37081927
Prupe.1G434000.1	bHLH	TF	Pp01	37109786	37111192
Prupe.1G434500.1	bZIP	TF	Pp01	37142086	37147800
Prupe.1G437800.1	B3	TF	Pp01	37288783	37289712
Prupe.1G437900.1	B3	TF	Pp01	37289890	37291959
Prupe.1G438000.1	B3	TF	Pp01	37292226	37294377
Prupe.1G441700.1	MYB	TF	Pp01	37500456	37501664
Prupe.1G445000.1	AUX/IAA	TR	Pp01	37689993	37692087
Prupe.1G445000.2	AUX/IAA	TR	Pp01	37689993	37692087
Prupe.1G445000.3	AUX/IAA	TR	Pp01	37689993	37692087
Prupe.1G447100.1	HB-HD-ZIP	TF	Pp01	37799808	37806022
Prupe.1G447100.2	HB-HD-ZIP	TF	Pp01	37799896	37805848
Prupe.1G447300.1	C2C2-GATA	TF	Pp01	37818331	37820281
Prupe.1G447400.1	C2C2-GATA	TF	Pp01	37823078	37825115
Prupe.1G448600.1	AP2/ERF-ERF	TF	Pp01	37887100	37888020
Prupe.1G451000.1	CPP	TF	Pp01	37989873	37995512
Prupe.1G451000.2	CPP	TF	Pp01	37989873	37995512
Prupe.1G452000.1	MYB	TF	Pp01	38038012	38044400
Prupe.1G452000.2	MYB	TF	Pp01	38038071	38044367
Prupe.1G452000.3	MYB	TF	Pp01	38038085	38044367
Prupe.1G454900.1	NAC	TF	Pp01	38207589	38210365
Prupe.1G454900.2	NAC	TF	Pp01	38207406	38210365
Prupe.1G454900.3	NAC	TF	Pp01	38207589	38210365
Prupe.1G455300.1	bZIP	TF	Pp01	38231929	38235195
Prupe.1G459100.1	WRKY	TF	Pp01	38446174	38448308
Prupe.1G464400.1	AP2/ERF-ERF	TF	Pp01	38747941	38748449
Prupe.1G467500.1	Tify	TF	Pp01	38946430	38950913
Prupe.1G468400.10	LUG	TR	Pp01	38989167	38997104
Prupe.1G468400.11	LUG	TR	Pp01	38989167	38997104
Prupe.1G468400.12	LUG	TR	Pp01	38989167	38997104
Prupe.1G468400.13	LUG	TR	Pp01	38989165	38996811
Prupe.1G468400.14	LUG	TR	Pp01	38989165	38996811
Prupe.1G468400.15	LUG	TR	Pp01	38989165	38996811
Prupe.1G468400.16	LUG	TR	Pp01	38989165	38996811
Prupe.1G468400.17	LUG	TR	Pp01	38989247	38996604
Prupe.1G468400.1	LUG	TR	Pp01	38989125	38997104
Prupe.1G468400.2	LUG	TR	Pp01	38989125	38997104
Prupe.1G468400.3	LUG	TR	Pp01	38989125	38997104
Prupe.1G468400.4	LUG	TR	Pp01	38989125	38997104
Prupe.1G468400.5	LUG	TR	Pp01	38989167	38997104
Prupe.1G468400.6	LUG	TR	Pp01	38989167	38997104
Prupe.1G468400.7	LUG	TR	Pp01	38989167	38997104
Prupe.1G468400.8	LUG	TR	Pp01	38989167	38997104
Prupe.1G468400.9	LUG	TR	Pp01	38989167	38997104
Prupe.1G471100.1	DBP	TF	Pp01	39207651	39210791
Prupe.1G471800.1	GNAT	TR	Pp01	39251680	39253963
Prupe.1G471800.2	GNAT	TR	Pp01	39251680	39254629
Prupe.1G473800.1	CPP	TF	Pp01	39354866	39360407
Prupe.1G473800.2	CPP	TF	Pp01	39354866	39360419
Prupe.1G473800.3	CPP	TF	Pp01	39354866	39360407
Prupe.1G478200.1	HB-other	TF	Pp01	40034540	40036725
Prupe.1G478400.1	bZIP	TF	Pp01	40039065	40041159
Prupe.1G480400.1	AP2/ERF-ERF	TF	Pp01	40131074	40132425
Prupe.1G481700.1	AUX/IAA	TR	Pp01	40205301	40207017
Prupe.1G481700.2	AUX/IAA	TR	Pp01	40205296	40207017
Prupe.1G481700.3	AUX/IAA	TR	Pp01	40205301	40207017
Prupe.1G482700.1	FAR1	TF	Pp01	40261817	40265326
Prupe.1G485700.1	SET	TR	Pp01	40443125	40456286
Prupe.1G485700.2	SET	TR	Pp01	40442242	40456369
Prupe.1G485700.3	SET	TR	Pp01	40442242	40456369
Prupe.1G485700.4	SET	TR	Pp01	40442733	40456286
Prupe.1G485700.5	SET	TR	Pp01	40442733	40456286
Prupe.1G485700.8	SET	TR	Pp01	40443125	40456286
Prupe.1G485700.9	SET	TR	Pp01	40443125	40456286
Prupe.1G486200.1	HB-KNOX	TF	Pp01	40478361	40482063
Prupe.1G486200.2	HB-KNOX	TF	Pp01	40478361	40482063
Prupe.1G487600.1	PHD	TR	Pp01	40615983	40621454
Prupe.1G487600.2	PHD	TR	Pp01	40615975	40621417
Prupe.1G487600.3	PHD	TR	Pp01	40615978	40621368
Prupe.1G487600.4	PHD	TR	Pp01	40615994	40621360
Prupe.1G487600.5	PHD	TR	Pp01	40615994	40621360
Prupe.1G487600.6	PHD	TR	Pp01	40615991	40621168
Prupe.1G487700.1	TRAF	TR	Pp01	40626822	40629742
Prupe.1G487700.2	TRAF	TR	Pp01	40628015	40629331
Prupe.1G487800.1	TRAF	TR	Pp01	40630437	40631824
Prupe.1G487900.1	TRAF	TR	Pp01	40632956	40634381
Prupe.1G488000.1	TRAF	TR	Pp01	40636061	40637946
Prupe.1G488100.1	TRAF	TR	Pp01	40640954	40643139
Prupe.1G488200.1	TRAF	TR	Pp01	40644167	40645375
Prupe.1G488300.1	TRAF	TR	Pp01	40652755	40654198
Prupe.1G488400.1	TRAF	TR	Pp01	40657533	40660251
Prupe.1G489000.1	C3H	TF	Pp01	40703640	40712528
Prupe.1G489000.2	C3H	TF	Pp01	40703640	40712721
Prupe.1G489300.1	SET	TR	Pp01	40735339	40743395
Prupe.1G489300.2	SET	TR	Pp01	40735339	40743395
Prupe.1G489400.1	MADS-MIKC	TF	Pp01	40746065	40748962
Prupe.1G489700.1	B3	TF	Pp01	40765810	40770112
Prupe.1G493100.1	NAC	TF	Pp01	40980078	40982143
Prupe.1G494200.1	Others	TR	Pp01	41064902	41067151
Prupe.1G494200.2	Others	TR	Pp01	41064845	41067268
Prupe.1G494200.3	Others	TR	Pp01	41064861	41067268
Prupe.1G494200.4	Others	TR	Pp01	41064861	41067212
Prupe.1G494200.5	Others	TR	Pp01	41064861	41067212
Prupe.1G494200.6	Others	TR	Pp01	41064861	41067151
Prupe.1G494200.7	Others	TR	Pp01	41064861	41067151
Prupe.1G495000.1	TRAF	TR	Pp01	41104555	41107099
Prupe.1G495100.1	TRAF	TR	Pp01	41108794	41112058
Prupe.1G496500.1	PHD	TR	Pp01	41159750	41170084
Prupe.1G496500.2	PHD	TR	Pp01	41159750	41169941
Prupe.1G496500.3	PHD	TR	Pp01	41159750	41169941
Prupe.1G496500.4	PHD	TR	Pp01	41159750	41169941
Prupe.1G496500.5	PHD	TR	Pp01	41166435	41170112
Prupe.1G500900.1	AP2/ERF-ERF	TF	Pp01	41462842	41464074
Prupe.1G501500.1	GRAS	TF	Pp01	41498576	41500096
Prupe.1G503000.1	CSD	TF	Pp01	41593109	41594112
Prupe.1G503600.1	C2H2	TF	Pp01	41637179	41639575
Prupe.1G503800.1	SET	TR	Pp01	41647567	41652582
Prupe.1G506100.2	PHD	TR	Pp01	41798666	41809509
Prupe.1G507000.1	B3-ARF	TF	Pp01	41847794	41852519
Prupe.1G508100.10	bZIP	TF	Pp01	41916341	41919415
Prupe.1G508100.11	bZIP	TF	Pp01	41916341	41919415
Prupe.1G508100.12	bZIP	TF	Pp01	41916341	41919405
Prupe.1G508100.13	bZIP	TF	Pp01	41916341	41919401
Prupe.1G508100.14	bZIP	TF	Pp01	41916341	41919401
Prupe.1G508100.15	bZIP	TF	Pp01	41916341	41919311
Prupe.1G508100.16	bZIP	TF	Pp01	41916341	41919311
Prupe.1G508100.17	bZIP	TF	Pp01	41916344	41919254
Prupe.1G508100.1	bZIP	TF	Pp01	41916344	41919876
Prupe.1G508100.2	bZIP	TF	Pp01	41916343	41920583
Prupe.1G508100.3	bZIP	TF	Pp01	41916343	41920583
Prupe.1G508100.4	bZIP	TF	Pp01	41916344	41920583
Prupe.1G508100.5	bZIP	TF	Pp01	41916344	41920583
Prupe.1G508100.6	bZIP	TF	Pp01	41916344	41919875
Prupe.1G508100.7	bZIP	TF	Pp01	41916343	41919874
Prupe.1G508100.8	bZIP	TF	Pp01	41916343	41919874
Prupe.1G508100.9	bZIP	TF	Pp01	41916341	41919481
Prupe.1G508200.1	bZIP	TF	Pp01	41925717	41927036
Prupe.1G511300.1	MADS-M-type	TF	Pp01	42095812	42100257
Prupe.1G513600.1	AP2/ERF-ERF	TF	Pp01	42272650	42274716
Prupe.1G514300.1	mTERF	TR	Pp01	42323606	42325386
Prupe.1G517200.1	B3	TF	Pp01	42521528	42525102
Prupe.1G517400.1	MYB	TF	Pp01	42530818	42532736
Prupe.1G519100.1	B3	TF	Pp01	42631238	42634236
Prupe.1G519400.1	C2H2	TF	Pp01	42652526	42653786
Prupe.1G521300.1	Jumonji	TR	Pp01	42752705	42762082
Prupe.1G521300.2	Jumonji	TR	Pp01	42752705	42762082
Prupe.1G523000.1	HB-HD-ZIP	TF	Pp01	42838769	42840584
Prupe.1G524500.1	bHLH	TF	Pp01	42988157	42990414
Prupe.1G524500.2	bHLH	TF	Pp01	42988560	42990414
Prupe.1G527100.1	zf-HD	TF	Pp01	43152627	43155075
Prupe.1G530800.1	bHLH	TF	Pp01	43387266	43388543
Prupe.1G531100.1	MADS-MIKC	TF	Pp01	43417246	43434717
Prupe.1G531100.2	MADS-MIKC	TF	Pp01	43417246	43425757
Prupe.1G531300.1	MADS-M-type	TF	Pp01	43426679	43427636
Prupe.1G531400.1	MADS-MIKC	TF	Pp01	43444855	43453102
Prupe.1G531500.1	MADS-M-type	TF	Pp01	43454705	43457149
Prupe.1G531600.1	MADS-MIKC	TF	Pp01	43464340	43471604
Prupe.1G531700.1	MADS-MIKC	TF	Pp01	43473533	43480648
Prupe.1G532600.1	MYB-related	TF	Pp01	43540489	43547299
Prupe.1G532600.2	MYB-related	TF	Pp01	43540489	43547299
Prupe.1G532600.3	MYB-related	TF	Pp01	43540489	43547299
Prupe.1G532600.4	MYB-related	TF	Pp01	43540489	43546781
Prupe.1G532700.1	MYB-related	TF	Pp01	43549766	43556638
Prupe.1G532700.2	MYB-related	TF	Pp01	43549766	43556638
Prupe.1G532700.3	MYB-related	TF	Pp01	43549766	43556638
Prupe.1G532700.4	MYB-related	TF	Pp01	43549766	43556638
Prupe.1G533700.1	MADS-M-type	TF	Pp01	43615998	43616687
Prupe.1G534300.1	C2C2-GATA	TF	Pp01	43675178	43679423
Prupe.1G534400.1	C2C2-GATA	TF	Pp01	43682540	43688265
Prupe.1G538700.1	MADS-M-type	TF	Pp01	44031155	44033143
Prupe.1G538700.2	MADS-M-type	TF	Pp01	44031155	44031921
Prupe.1G539700.1	B3	TF	Pp01	44101727	44103085
Prupe.1G540400.1	bHLH	TF	Pp01	44159472	44161337
Prupe.1G540700.1	AUX/IAA	TR	Pp01	44179629	44185073
Prupe.1G545400.1	AP2/ERF-ERF	TF	Pp01	44558295	44559250
Prupe.1G545700.1	AP2/ERF-ERF	TF	Pp01	44581442	44582361
Prupe.1G546100.1	AP2/ERF-ERF	TF	Pp01	44624928	44625849
Prupe.1G547000.1	MED7	TR	Pp01	44713998	44717450
Prupe.1G548000.1	MADS-MIKC	TF	Pp01	44800773	44805151
Prupe.1G548000.2	MADS-MIKC	TF	Pp01	44800773	44805151
Prupe.1G549600.1	MADS-MIKC	TF	Pp01	44924522	44931398
Prupe.1G549600.2	MADS-MIKC	TF	Pp01	44924535	44931199
Prupe.1G549600.3	MADS-MIKC	TF	Pp01	44924714	44931201
Prupe.1G551400.1	MYB	TF	Pp01	45091867	45094222
Prupe.1G551400.2	MYB-related	TF	Pp01	45091867	45093354
Prupe.1G551600.1	C2H2	TF	Pp01	45106095	45108859
Prupe.1G551600.2	C2H2	TF	Pp01	45106095	45108859
Prupe.1G551600.3	C2H2	TF	Pp01	45106152	45108860
Prupe.1G551600.4	C2H2	TF	Pp01	45106873	45108860
Prupe.1G554100.1	MADS-M-type	TF	Pp01	45267232	45268877
Prupe.1G554600.10	bHLH	TF	Pp01	45292401	45295866
Prupe.1G554600.1	bHLH	TF	Pp01	45290656	45296300
Prupe.1G554600.2	bHLH	TF	Pp01	45290649	45296326
Prupe.1G554600.3	bHLH	TF	Pp01	45290648	45296295
Prupe.1G554600.4	bHLH	TF	Pp01	45290716	45296300
Prupe.1G554600.5	bHLH	TF	Pp01	45291069	45296327
Prupe.1G554600.6	bHLH	TF	Pp01	45291095	45296235
Prupe.1G554600.7	bHLH	TF	Pp01	45291095	45295817
Prupe.1G554600.8	bHLH	TF	Pp01	45291923	45296263
Prupe.1G554600.9	bHLH	TF	Pp01	45292580	45296263
Prupe.1G556000.1	Others	TR	Pp01	45414685	45422620
Prupe.1G556000.2	Others	TR	Pp01	45414800	45422554
Prupe.1G559800.1	SWI/SNF-BAF60b	TR	Pp01	45698046	45704844
Prupe.1G559800.2	SWI/SNF-BAF60b	TR	Pp01	45698046	45704844
Prupe.1G559800.3	SWI/SNF-BAF60b	TR	Pp01	45698046	45701737
Prupe.1G559800.4	SWI/SNF-BAF60b	TR	Pp01	45698046	45701346
Prupe.1G559900.1	C3H	TF	Pp01	45707294	45711311
Prupe.1G559900.2	C3H	TF	Pp01	45707272	45711225
Prupe.1G559900.3	C3H	TF	Pp01	45707338	45711091
Prupe.1G560100.1	NAC	TF	Pp01	45724265	45726152
Prupe.1G560100.2	NAC	TF	Pp01	45724490	45726054
Prupe.1G561700.1	TUB	TF	Pp01	45851488	45857122
Prupe.1G561700.2	TUB	TF	Pp01	45851474	45857083
Prupe.1G561700.3	TUB	TF	Pp01	45851488	45857083
Prupe.1G562000.1	bZIP	TF	Pp01	45902440	45906595
Prupe.1G564300.1	WRKY	TF	Pp01	46096258	46098769
Prupe.1G565600.1	C2H2	TF	Pp01	46170067	46172936
Prupe.1G574300.1	B3	TF	Pp01	46784719	46785075
Prupe.1G574400.1	B3	TF	Pp01	46787177	46787533
Prupe.1G575600.1	NAC	TF	Pp01	46889483	46889899
Prupe.1G576100.1	C2H2	TF	Pp01	46920252	46926322
Prupe.1G576100.2	C2H2	TF	Pp01	46920252	46926322
Prupe.1G576500.1	TCP	TF	Pp01	46940392	46943238
Prupe.1G578500.1	Tify	TF	Pp01	47075732	47079165
Prupe.1G578500.2	Tify	TF	Pp01	47075732	47079165
Prupe.1G579400.1	B3	TF	Pp01	47145736	47148694
Prupe.1G579400.2	B3	TF	Pp01	47145736	47148694
Prupe.1G579400.3	B3	TF	Pp01	47146935	47148694
Prupe.1G579400.4	B3	TF	Pp01	47147164	47148784
Prupe.1G582800.11	SWI/SNF-BAF60b	TR	Pp01	47330431	47342198
Prupe.1G582800.12	SWI/SNF-BAF60b	TR	Pp01	47330431	47342198
Prupe.1G582800.13	SWI/SNF-BAF60b	TR	Pp01	47330431	47342198
Prupe.1G582800.14	SWI/SNF-BAF60b	TR	Pp01	47330108	47339445
Prupe.1G582800.15	SWI/SNF-BAF60b	TR	Pp01	47330398	47339577
Prupe.1G582800.1	SWI/SNF-BAF60b	TR	Pp01	47329864	47342198
Prupe.1G582800.2	SWI/SNF-BAF60b	TR	Pp01	47330099	47342198
Prupe.1G582800.4	SWI/SNF-BAF60b	TR	Pp01	47330295	47342198
Prupe.1G582800.5	SWI/SNF-BAF60b	TR	Pp01	47330383	47342198
Prupe.1G582800.6	SWI/SNF-BAF60b	TR	Pp01	47330385	47342198
Prupe.1G582800.7	SWI/SNF-BAF60b	TR	Pp01	47330387	47342198
Prupe.1G582800.8	SWI/SNF-BAF60b	TR	Pp01	47330393	47342198
Prupe.1G583000.1	FAR1	TF	Pp01	47345043	47353056
Prupe.1G583500.1	BSD	TF	Pp01	47384705	47392608
Prupe.1G583500.2	BSD	TF	Pp01	47384705	47392589
Prupe.1G585000.1	C3H	TF	Pp01	47482548	47491814
Prupe.1G585200.1	B3-ARF	TF	Pp01	47497437	47506663
Prupe.1G585200.2	B3-ARF	TF	Pp01	47498125	47505366
Prupe.1G586000.1	zf-HD	TF	Pp01	47574694	47577403
Prupe.1G587000.10	Alfin-like	TF	Pp01	47642762	47648768
Prupe.1G587000.1	Alfin-like	TF	Pp01	47642762	47648788
Prupe.1G587000.2	Alfin-like	TF	Pp01	47642762	47648788
Prupe.1G587000.3	Alfin-like	TF	Pp01	47642762	47648785
Prupe.1G587000.4	Alfin-like	TF	Pp01	47642762	47648785
Prupe.1G587000.5	Alfin-like	TF	Pp01	47642762	47648785
Prupe.1G587000.6	Alfin-like	TF	Pp01	47642762	47648785
Prupe.1G587000.7	Alfin-like	TF	Pp01	47642762	47648785
Prupe.1G587000.8	Alfin-like	TF	Pp01	47642762	47648785
Prupe.1G587000.9	Alfin-like	TF	Pp01	47642762	47648785
Prupe.1G587100.1	NAC	TF	Pp01	47661685	47664396
Prupe.1G587100.2	NAC	TF	Pp01	47661676	47664477
Prupe.1G587100.3	NAC	TF	Pp01	47661916	47664396
Prupe.1G587100.4	NAC	TF	Pp01	47661747	47663771
Prupe.2G004000.1	HB-HD-ZIP	TF	Pp02	413865	416004
Prupe.2G004000.2	HB-HD-ZIP	TF	Pp02	413711	416107
Prupe.2G004000.3	HB-HD-ZIP	TF	Pp02	413859	416208
Prupe.2G004000.4	HB-HD-ZIP	TF	Pp02	413865	416011
Prupe.2G004000.5	HB-HD-ZIP	TF	Pp02	413865	416004
Prupe.2G004000.6	HB-HD-ZIP	TF	Pp02	413865	416004
Prupe.2G004300.1	MYB-related	TF	Pp02	437412	442589
Prupe.2G009100.1	bHLH	TF	Pp02	802481	805755
Prupe.2G009100.2	bHLH	TF	Pp02	802524	805754
Prupe.2G009100.3	bHLH	TF	Pp02	802524	805617
Prupe.2G011700.1	C3H	TF	Pp02	1034066	1039094
Prupe.2G011700.2	C3H	TF	Pp02	1031390	1039094
Prupe.2G012800.1	MYB	TF	Pp02	1108699	1111146
Prupe.2G013600.1	FAR1	TF	Pp02	1197266	1198442
Prupe.2G014200.1	LOB	TF	Pp02	1258279	1259278
Prupe.2G014500.1	NF-YA	TF	Pp02	1285333	1293724
Prupe.2G020400.1	bZIP	TF	Pp02	2029712	2033785
Prupe.2G023100.1	MADS-MIKC	TF	Pp02	2252608	2258167
Prupe.2G023100.2	MADS-MIKC	TF	Pp02	2252608	2257379
Prupe.2G024200.1	GNAT	TR	Pp02	2401043	2404403
Prupe.2G024200.2	GNAT	TR	Pp02	2401043	2402038
Prupe.2G025800.1	bZIP	TF	Pp02	2656608	2659529
Prupe.2G025800.2	bZIP	TF	Pp02	2656608	2659529
Prupe.2G025800.3	bZIP	TF	Pp02	2656608	2658461
Prupe.2G028700.10	GRAS	TF	Pp02	2987997	2990512
Prupe.2G028700.1	GRAS	TF	Pp02	2987997	2990761
Prupe.2G028700.2	GRAS	TF	Pp02	2987915	2990780
Prupe.2G028700.3	GRAS	TF	Pp02	2987915	2990779
Prupe.2G028700.4	GRAS	TF	Pp02	2987967	2990786
Prupe.2G028700.5	GRAS	TF	Pp02	2987989	2990780
Prupe.2G028700.6	GRAS	TF	Pp02	2987997	2990786
Prupe.2G028700.7	GRAS	TF	Pp02	2987997	2990780
Prupe.2G028700.8	GRAS	TF	Pp02	2987989	2990734
Prupe.2G028700.9	GRAS	TF	Pp02	2987989	2990734
Prupe.2G034500.1	SNF2	TR	Pp02	3715595	3721995
Prupe.2G034500.2	SNF2	TR	Pp02	3715666	3722386
Prupe.2G034700.1	Others	TR	Pp02	3741026	3742992
Prupe.2G036500.1	SRS	TF	Pp02	3943572	3946596
Prupe.2G036500.2	SRS	TF	Pp02	3943572	3946596
Prupe.2G036500.3	SRS	TF	Pp02	3943572	3946596
Prupe.2G036500.4	SRS	TF	Pp02	3943572	3946596
Prupe.2G037000.1	mTERF	TR	Pp02	3985702	3988968
Prupe.2G037400.1	mTERF	TR	Pp02	4009337	4012161
Prupe.2G037400.2	mTERF	TR	Pp02	4009337	4012216
Prupe.2G037400.3	mTERF	TR	Pp02	4009337	4012164
Prupe.2G037400.4	mTERF	TR	Pp02	4009337	4012162
Prupe.2G037400.5	mTERF	TR	Pp02	4009337	4012162
Prupe.2G037400.6	mTERF	TR	Pp02	4009337	4012161
Prupe.2G037400.7	mTERF	TR	Pp02	4009337	4012161
Prupe.2G037400.8	mTERF	TR	Pp02	4009337	4012161
Prupe.2G039000.1	Trihelix	TF	Pp02	4205544	4208256
Prupe.2G040200.1	mTERF	TR	Pp02	4361489	4364488
Prupe.2G040300.1	mTERF	TR	Pp02	4418091	4420435
Prupe.2G040400.1	mTERF	TR	Pp02	4439359	4441110
Prupe.2G040400.2	mTERF	TR	Pp02	4439359	4441110
Prupe.2G041000.1	mTERF	TR	Pp02	4510876	4513777
Prupe.2G041000.2	mTERF	TR	Pp02	4510929	4512657
Prupe.2G041000.3	mTERF	TR	Pp02	4510908	4512411
Prupe.2G041100.1	mTERF	TR	Pp02	4523844	4527217
Prupe.2G041100.2	mTERF	TR	Pp02	4523851	4527137
Prupe.2G041300.1	bZIP	TF	Pp02	4536782	4550063
Prupe.2G042200.1	C2H2	TF	Pp02	4617772	4618188
Prupe.2G042400.1	SET	TR	Pp02	4633255	4643643
Prupe.2G042400.2	SET	TR	Pp02	4631647	4643643
Prupe.2G042400.3	SET	TR	Pp02	4633255	4643723
Prupe.2G042400.4	SET	TR	Pp02	4633255	4643691
Prupe.2G042400.5	SET	TR	Pp02	4633255	4643643
Prupe.2G042800.10	RB	TR	Pp02	4710491	4718242
Prupe.2G042800.11	RB	TR	Pp02	4710491	4718242
Prupe.2G042800.12	RB	TR	Pp02	4710492	4718242
Prupe.2G042800.1	RB	TR	Pp02	4710492	4718518
Prupe.2G042800.2	RB	TR	Pp02	4710490	4718631
Prupe.2G042800.3	RB	TR	Pp02	4710491	4718532
Prupe.2G042800.4	RB	TR	Pp02	4710441	4718475
Prupe.2G042800.5	RB	TR	Pp02	4710491	4718518
Prupe.2G042800.6	RB	TR	Pp02	4710491	4718420
Prupe.2G042800.7	RB	TR	Pp02	4710491	4718403
Prupe.2G042800.8	RB	TR	Pp02	4710442	4718252
Prupe.2G042800.9	RB	TR	Pp02	4710491	4718242
Prupe.2G042900.1	C2H2	TF	Pp02	4720091	4724237
Prupe.2G047600.1	NF-YC	TF	Pp02	5480958	5487065
Prupe.2G047900.1	MADS-M-type	TF	Pp02	5499507	5500408
Prupe.2G048100.1	C2H2	TF	Pp02	5522156	5523190
Prupe.2G048400.1	C2H2	TF	Pp02	5579973	5580983
Prupe.2G049400.1	mTERF	TR	Pp02	5664325	5666286
Prupe.2G050100.1	MYB	TF	Pp02	5777118	5782601
Prupe.2G050100.2	MYB	TF	Pp02	5777140	5782601
Prupe.2G054400.1	C2H2	TF	Pp02	6398661	6399594
Prupe.2G054600.1	C2H2	TF	Pp02	6457424	6458968
Prupe.2G055000.1	SET	TR	Pp02	6487557	6490573
Prupe.2G056800.1	bZIP	TF	Pp02	6770564	6777727
Prupe.2G056800.2	bZIP	TF	Pp02	6770570	6776450
Prupe.2G056800.3	bZIP	TF	Pp02	6770570	6776450
Prupe.2G057500.1	Rcd1-like	TR	Pp02	7069875	7071281
Prupe.2G058400.1	EIL	TF	Pp02	7259767	7263776
Prupe.2G058500.1	EIL	TF	Pp02	7293570	7297473
Prupe.2G058800.1	SET	TR	Pp02	7322313	7327887
Prupe.2G058800.2	SET	TR	Pp02	7322423	7327887
Prupe.2G058800.3	SET	TR	Pp02	7322423	7327887
Prupe.2G058800.4	SET	TR	Pp02	7322423	7327887
Prupe.2G058800.5	SET	TR	Pp02	7323295	7327887
Prupe.2G058900.10	FAR1	TF	Pp02	7328098	7334988
Prupe.2G058900.11	FAR1	TF	Pp02	7328098	7334988
Prupe.2G058900.12	FAR1	TF	Pp02	7328098	7334988
Prupe.2G058900.13	FAR1	TF	Pp02	7328098	7334988
Prupe.2G058900.14	FAR1	TF	Pp02	7330382	7334989
Prupe.2G058900.15	FAR1	TF	Pp02	7330382	7334989
Prupe.2G058900.16	FAR1	TF	Pp02	7330382	7334989
Prupe.2G058900.1	FAR1	TF	Pp02	7328098	7334988
Prupe.2G058900.2	FAR1	TF	Pp02	7328076	7335141
Prupe.2G058900.3	FAR1	TF	Pp02	7328076	7334994
Prupe.2G058900.4	FAR1	TF	Pp02	7328095	7334994
Prupe.2G058900.5	FAR1	TF	Pp02	7328098	7334994
Prupe.2G058900.6	FAR1	TF	Pp02	7328097	7334988
Prupe.2G058900.7	FAR1	TF	Pp02	7328098	7334989
Prupe.2G058900.8	FAR1	TF	Pp02	7328098	7334989
Prupe.2G058900.9	FAR1	TF	Pp02	7328098	7334989
Prupe.2G060200.1	AP2/ERF-AP2	TF	Pp02	7609098	7614809
Prupe.2G060700.1	mTERF	TR	Pp02	7658770	7663128
Prupe.2G060700.2	mTERF	TR	Pp02	7658770	7663128
Prupe.2G060700.3	mTERF	TR	Pp02	7658770	7663128
Prupe.2G061200.1	C2H2	TF	Pp02	7758595	7763287
Prupe.2G061200.2	C2H2	TF	Pp02	7758644	7763287
Prupe.2G061200.3	C2H2	TF	Pp02	7758632	7762609
Prupe.2G063800.1	C2C2-Dof	TF	Pp02	8561919	8563066
Prupe.2G064400.1	SET	TR	Pp02	8675023	8675438
Prupe.2G064600.1	SET	TR	Pp02	8747500	8749952
Prupe.2G069200.1	SET	TR	Pp02	9888504	9891249
Prupe.2G070600.1	MYB	TF	Pp02	10688313	10690763
Prupe.2G071500.1	OFP	TF	Pp02	10860506	10861421
Prupe.2G085900.1	MED7	TR	Pp02	13614323	13616683
Prupe.2G085900.2	MED7	TR	Pp02	13614323	13616752
Prupe.2G086500.1	Trihelix	TF	Pp02	13708491	13711214
Prupe.2G090800.1	Trihelix	TF	Pp02	14347653	14351353
Prupe.2G091000.1	FAR1	TF	Pp02	14353568	14356065
Prupe.2G091300.1	NAC	TF	Pp02	14426671	14432723
Prupe.2G091500.1	NAC	TF	Pp02	14455612	14459601
Prupe.2G097200.1	bHLH	TF	Pp02	15228340	15230787
Prupe.2G097200.2	bHLH	TF	Pp02	15228340	15229831
Prupe.2G097400.1	bHLH	TF	Pp02	15243042	15244056
Prupe.2G100300.1	B3	TF	Pp02	15605934	15612953
Prupe.2G100300.2	B3	TF	Pp02	15606757	15612953
Prupe.2G100300.3	B3	TF	Pp02	15606766	15612919
Prupe.2G100300.4	B3	TF	Pp02	15606777	15612919
Prupe.2G102200.1	C3H	TF	Pp02	15800185	15803767
Prupe.2G102200.2	C3H	TF	Pp02	15800185	15803765
[truncated: 5,605 more rows]
