# Supplementary material
Source: MDPI journal article supplement (https://www.mdpi.com/2311-7524/9/2/175)
Supplement: s1 [file s1 › Table S4.xlsx]

## Sheet: Sheet1
Table S4 Overview of Illumina RNA-Seq libraries
Samples	Read Number	Base Number	GC Content	%≥Q30
BF_rep1	21010821	6281958888	46.15	95.11
BF_rep2	22619855	6763781736	46.41	95.27
BF_rep3	21416822	6402285766	46.41	94.97
LS_rep1	23263716	6951011750	46.41	95.26
LS_rep2	23484405	7026680736	46.45	95.28
LS_rep3	26457327	7913029470	46.55	95.23
YL_rep1	23958319	7146863260	46.64	91.55
YL_rep2	21089661	6319767978	46.62	92.49
YL_rep3	22364546	6692047086	46.02	91.79
JP_rep1	21520969	6446347530	46.44	91.27
JP_rep2	22037570	6586089938	46.39	91.79
JP_rep3	23007877	6868278250	46.4	90.91
S1A_rep1	23280788	6960630076	45.89	92.52
S1A_rep2	23414046	6997896448	46.04	91.85
S1A_rep3	21944939	6576132810	45.83	91.95
S3A_rep1	25117824	7509605116	46.34	95.09
S3A_rep2	21908948	6551101590	46.12	95.06
S3A_rep3	26093881	7801652000	46.27	95.01
S4_rep1	21879457	6545043358	46.18	95.2
S4_rep2	23495761	7023879304	46.44	95.51
S4_rep3	24236645	7254608398	46.13	95.27
ML_rep1	20163827	6033905588	46.34	95.31
ML_rep2	20441037	6116835294	46.44	94.99
ML_rep3	21599014	6455375062	46.42	95.18
MP_rep1	24711756	7389327954	46.33	95
MP_rep2	25443422	7607123934	46.15	95.19
MP_rep3	22099344	6615676890	46.41	95.35
SH_rep1	21040434	6289832172	46.26	95.24
SH_rep2	21318469	6382078674	45.99	95.08
SH_rep3	21250662	6360753318	46.03	95.21
