# Supplementary material
Source: MDPI journal article supplement (https://www.mdpi.com/2311-7524/9/2/175)
Supplement: s1 [file s1 › Table S5.xlsx]

## Sheet: cluster_analysis_group2&10
Table S5 List of genes containing different transcripts distributed in both juvenile fruits (cluster 10) and ripening fruits (cluster 2)
Gene	Transcripts in cluster 2	Transcripts in cluster 10
PB.10167	PB.10167.1	PB.10167.2
PB.10177	PB.10177.2	PB.10177.3
PB.1032	PB.1032.1	PB.1032.4
PB.10627	PB.10627.1	PB.10627.4
PB.10890	PB.10890.1	PB.10890.3
PB.10981	PB.10981.1	PB.10981.2
PB.11025	PB.11025.1	PB.11025.3
PB.11049	PB.11049.1	PB.11049.2
PB.11193	PB.11193.4	PB.11193.1
PB.11223	PB.11223.2	PB.11223.1
PB.11323	PB.11323.6	PB.11323.5
PB.11569	PB.11569.2	PB.11569.4
PB.11816	PB.11816.1	PB.11816.3
PB.12094	PB.12094.2	PB.12094.1
PB.12270	PB.12270.4	PB.12270.1
PB.12434	PB.12434.10	PB.12434.1
PB.12434	PB.12434.10	PB.12434.3
PB.12518	PB.12518.1	PB.12518.3
PB.12724	PB.12724.6	PB.12724.4
PB.12835	PB.12835.16	PB.12835.10
PB.12835	PB.12835.16	PB.12835.14
PB.12835	PB.12835.16	PB.12835.34
PB.12835	PB.12835.16	PB.12835.35
PB.12835	PB.12835.16	PB.12835.7
PB.12835	PB.12835.30	PB.12835.10
PB.12835	PB.12835.30	PB.12835.14
PB.12835	PB.12835.30	PB.12835.34
PB.12835	PB.12835.30	PB.12835.35
PB.12835	PB.12835.30	PB.12835.7
PB.12835	PB.12835.5	PB.12835.10
PB.12835	PB.12835.5	PB.12835.14
PB.12835	PB.12835.5	PB.12835.34
PB.12835	PB.12835.5	PB.12835.35
PB.12835	PB.12835.5	PB.12835.7
PB.12904	PB.12904.2	PB.12904.1
PB.13187	PB.13187.7	PB.13187.1
PB.13317	PB.13317.1	PB.13317.4
PB.13431	PB.13431.4	PB.13431.1
PB.13757	PB.13757.1	PB.13757.3
PB.13764	PB.13764.1	PB.13764.2
PB.13883	PB.13883.1	PB.13883.3
PB.13941	PB.13941.1	PB.13941.2
PB.13954	PB.13954.2	PB.13954.1
PB.14148	PB.14148.1	PB.14148.2
PB.14299	PB.14299.1	PB.14299.3
PB.14447	PB.14447.2	PB.14447.1
PB.14462	PB.14462.11	PB.14462.7
PB.14698	PB.14698.2	PB.14698.1
PB.1512	PB.1512.1	PB.1512.9
PB.15221	PB.15221.2	PB.15221.1
PB.1523	PB.1523.5	PB.1523.1
PB.1977	PB.1977.1	PB.1977.17
PB.2077	PB.2077.1	PB.2077.3
PB.2077	PB.2077.4	PB.2077.3
PB.2169	PB.2169.3	PB.2169.2
PB.2211	PB.2211.2	PB.2211.4
PB.2352	PB.2352.3	PB.2352.1
PB.2383	PB.2383.1	PB.2383.2
PB.2447	PB.2447.1	PB.2447.2
PB.2642	PB.2642.4	PB.2642.5
PB.2645	PB.2645.3	PB.2645.1
PB.2670	PB.2670.2	PB.2670.1
PB.2875	PB.2875.1	PB.2875.2
PB.3056	PB.3056.2	PB.3056.1
PB.3056	PB.3056.2	PB.3056.3
PB.3056	PB.3056.2	PB.3056.4
PB.3118	PB.3118.10	PB.3118.7
PB.3208	PB.3208.47	PB.3208.121
PB.3208	PB.3208.47	PB.3208.122
PB.3208	PB.3208.47	PB.3208.18
PB.3208	PB.3208.47	PB.3208.22
PB.3208	PB.3208.47	PB.3208.23
PB.3208	PB.3208.47	PB.3208.25
PB.3208	PB.3208.47	PB.3208.40
PB.3208	PB.3208.47	PB.3208.42
PB.3208	PB.3208.47	PB.3208.64
PB.3208	PB.3208.47	PB.3208.95
PB.3208	PB.3208.77	PB.3208.121
PB.3208	PB.3208.77	PB.3208.122
PB.3208	PB.3208.77	PB.3208.18
PB.3208	PB.3208.77	PB.3208.22
PB.3208	PB.3208.77	PB.3208.23
PB.3208	PB.3208.77	PB.3208.25
PB.3208	PB.3208.77	PB.3208.40
PB.3208	PB.3208.77	PB.3208.42
PB.3208	PB.3208.77	PB.3208.64
PB.3208	PB.3208.77	PB.3208.95
PB.3208	PB.3208.87	PB.3208.121
PB.3208	PB.3208.87	PB.3208.122
PB.3208	PB.3208.87	PB.3208.18
PB.3208	PB.3208.87	PB.3208.22
PB.3208	PB.3208.87	PB.3208.23
PB.3208	PB.3208.87	PB.3208.25
PB.3208	PB.3208.87	PB.3208.40
PB.3208	PB.3208.87	PB.3208.42
PB.3208	PB.3208.87	PB.3208.64
PB.3208	PB.3208.87	PB.3208.95
PB.3208	PB.3208.91	PB.3208.121
PB.3208	PB.3208.91	PB.3208.122
PB.3208	PB.3208.91	PB.3208.18
PB.3208	PB.3208.91	PB.3208.22
PB.3208	PB.3208.91	PB.3208.23
PB.3208	PB.3208.91	PB.3208.25
PB.3208	PB.3208.91	PB.3208.40
PB.3208	PB.3208.91	PB.3208.42
PB.3208	PB.3208.91	PB.3208.64
PB.3208	PB.3208.91	PB.3208.95
PB.3208	PB.3208.93	PB.3208.121
PB.3208	PB.3208.93	PB.3208.122
PB.3208	PB.3208.93	PB.3208.18
PB.3208	PB.3208.93	PB.3208.22
PB.3208	PB.3208.93	PB.3208.23
PB.3208	PB.3208.93	PB.3208.25
PB.3208	PB.3208.93	PB.3208.40
PB.3208	PB.3208.93	PB.3208.42
PB.3208	PB.3208.93	PB.3208.64
PB.3208	PB.3208.93	PB.3208.95
PB.3255	PB.3255.4	PB.3255.3
PB.3273	PB.3273.10	PB.3273.21
PB.3273	PB.3273.10	PB.3273.24
PB.331	PB.331.4	PB.331.1
PB.3746	PB.3746.2	PB.3746.1
PB.3948	PB.3948.1	PB.3948.3
PB.4008	PB.4008.1	PB.4008.6
PB.4215	PB.4215.1	PB.4215.3
PB.4215	PB.4215.1	PB.4215.9
PB.4244	PB.4244.1	PB.4244.4
PB.4473	PB.4473.1	PB.4473.2
PB.4476	PB.4476.1	PB.4476.3
PB.4670	PB.4670.5	PB.4670.4
PB.4854	PB.4854.3	PB.4854.2
PB.4868	PB.4868.1	PB.4868.2
PB.4890	PB.4890.3	PB.4890.1
PB.5088	PB.5088.5	PB.5088.3
PB.5212	PB.5212.1	PB.5212.2
PB.5266	PB.5266.3	PB.5266.8
PB.5317	PB.5317.1	PB.5317.4
PB.5413	PB.5413.1	PB.5413.5
PB.5417	PB.5417.1	PB.5417.2
PB.5499	PB.5499.1	PB.5499.4
PB.5821	PB.5821.2	PB.5821.6
PB.5915	PB.5915.1	PB.5915.2
PB.5992	PB.5992.1	PB.5992.3
PB.6155	PB.6155.2	PB.6155.5
PB.624	PB.624.1	PB.624.3
PB.6413	PB.6413.1	PB.6413.3
PB.6532	PB.6532.2	PB.6532.1
PB.6552	PB.6552.3	PB.6552.2
PB.6805	PB.6805.2	PB.6805.1
PB.683	PB.683.55	PB.683.45
PB.683	PB.683.55	PB.683.8
PB.7264	PB.7264.2	PB.7264.3
PB.7332	PB.7332.1	PB.7332.3
PB.740	PB.740.1	PB.740.2
PB.7837	PB.7837.3	PB.7837.2
PB.7853	PB.7853.3	PB.7853.1
PB.7853	PB.7853.4	PB.7853.1
PB.7853	PB.7853.6	PB.7853.1
PB.7960	PB.7960.1	PB.7960.2
PB.7961	PB.7961.3	PB.7961.1
PB.7961	PB.7961.3	PB.7961.2
PB.8552	PB.8552.1	PB.8552.2
PB.8553	PB.8553.1	PB.8553.4
PB.8584	PB.8584.1	PB.8584.2
PB.8782	PB.8782.2	PB.8782.3
PB.9	PB.9.4	PB.9.3
PB.9021	PB.9021.1	PB.9021.2
PB.927	PB.927.5	PB.927.2
PB.951	PB.951.11	PB.951.8
PB.980	PB.980.3	PB.980.2
PB.989	PB.989.8	PB.989.2
PB.993	PB.993.11	PB.993.7
PB.993	PB.993.14	PB.993.7
