# Supplementary material
Source: MDPI journal article supplement (https://www.mdpi.com/2311-7524/9/2/175)
Supplement: s1 [file s1 › Table S6.pdf]

Table S6 Sequences of primers used for RT-qPCR

| Primer name | Sequence                  | Description                            |
|-------------|---------------------------|----------------------------------------|
| Q1F         | TCATCGGCATCGGATTCAC       | primers used for qRT-PCR of PB.2421.1  |
| Q1R         | TCTTCGCCTTAGCCACCTTT      |                                        |
| Q2F         | ACCCCTCATTCCCACATTCA      | primers used for qRT-PCR of PB.3771.1  |
| Q2R         | GCGACCCTGGTAAGCATAGTTG    |                                        |
| Q3F         | AGAAAGGCGACAATGGGTGA      | primers used for qRT-PCR of PB.5324.1  |
| Q3R         | AACTTAACTCTGTGCCAAAATCC   |                                        |
| Q4F         | TGTAACCCTCAATCAAATACCCTG  | primers used for qRT-PCR of PB.5339.1  |
| Q4R         | TGCTGTGAGATTAAATCCCTCCA   |                                        |
| Q5F         | GGGTAACCTTGATTTTGGCTTTCT  | primers used for qRT-PCR of PB.14608.2 |
| Q5R         | TCATTGTTTGTATCCCACAGTGC   |                                        |
| Q6F         | TGATGAGCAGAATGATCGAAAAG   | primers used for qRT-PCR of PB.14608.3 |
| Q6R         | CAGATGCAAAAGACAGATACCACA  |                                        |
| Q7F         | AAGAGCAGTCTCCTCCTCAGTTTC  | primers used for qRT-PCR of PB.8516.1  |
| Q7R         | GATGAGCGGTGATTTGGGAT      |                                        |
| Q8F         | AAGGTGAAATATGTTACTCTTGAGG | primers used for qRT-PCR of PB.8516.2  |
| Q8R         | GTTTGTAATGTTTCTCGCCTTGT   |                                        |
