# Supplementary material
Source: MDPI journal article supplement (https://www.mdpi.com/2311-7524/9/2/175)

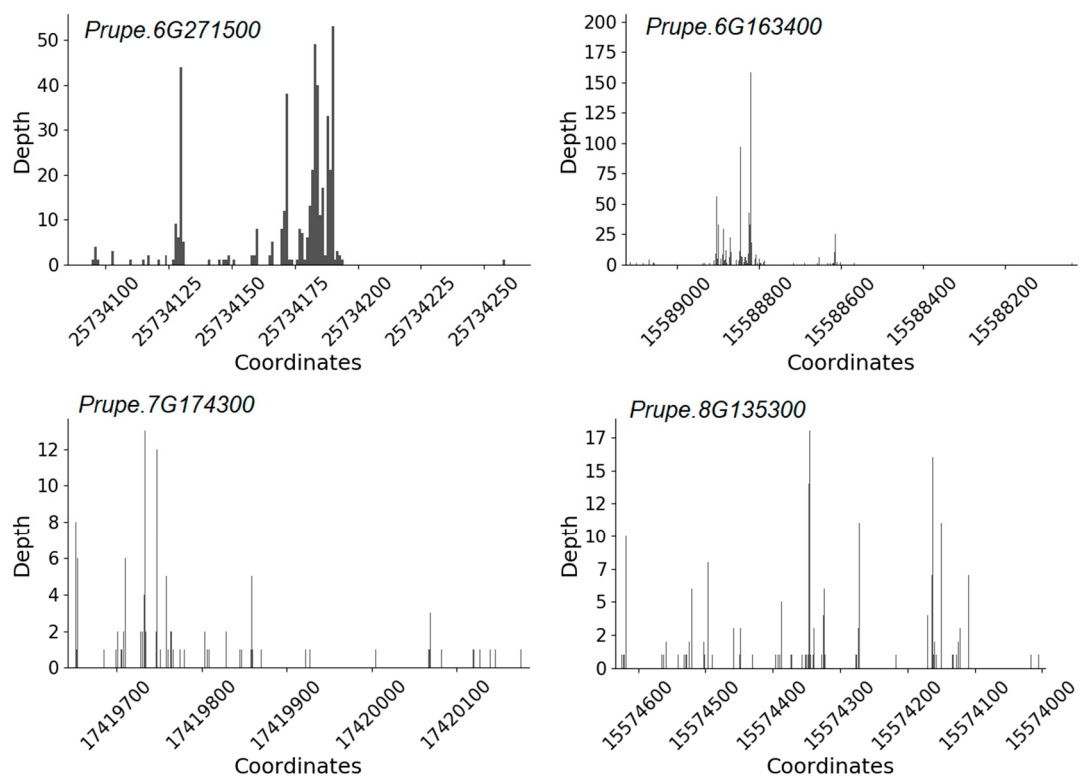

Figure S1 The APA signals of mRNAs.

Supplement: s1 [file s1 › Figure S1.pdf]
